# Supplementary material for: A Method Proposal to Adapt Urban Open-Built and Green Spaces to Climate Change
Source: MDPI journal article supplement (doi:10.3390/su15108111), 2023-05-16
Supplement: s1 [file s1]

# Supplementary materials

The Supplementary materials is articulated in the following four parts:

- List of acronyms;
- Characteristics of open spaces and districts according to their physical characteristics;
- Characteristics of open spaces based on costs for climate adaptation interventions;
- Description of the proposed climate adaptation interventions.

**List of acronyms**

UHI – Urban Heat Island

LST – Land Surface Temperature

LPT – Local Public Transport

IPI - Local Permeability Index

ITCI - Local Thermal Comfort Index

IAI - Local Accessibility Index

IPt - Total Permeability Index

ITCt - Total Thermal Comfort Index

## Characteristics of open spaces and districts according to their physical characteristics:

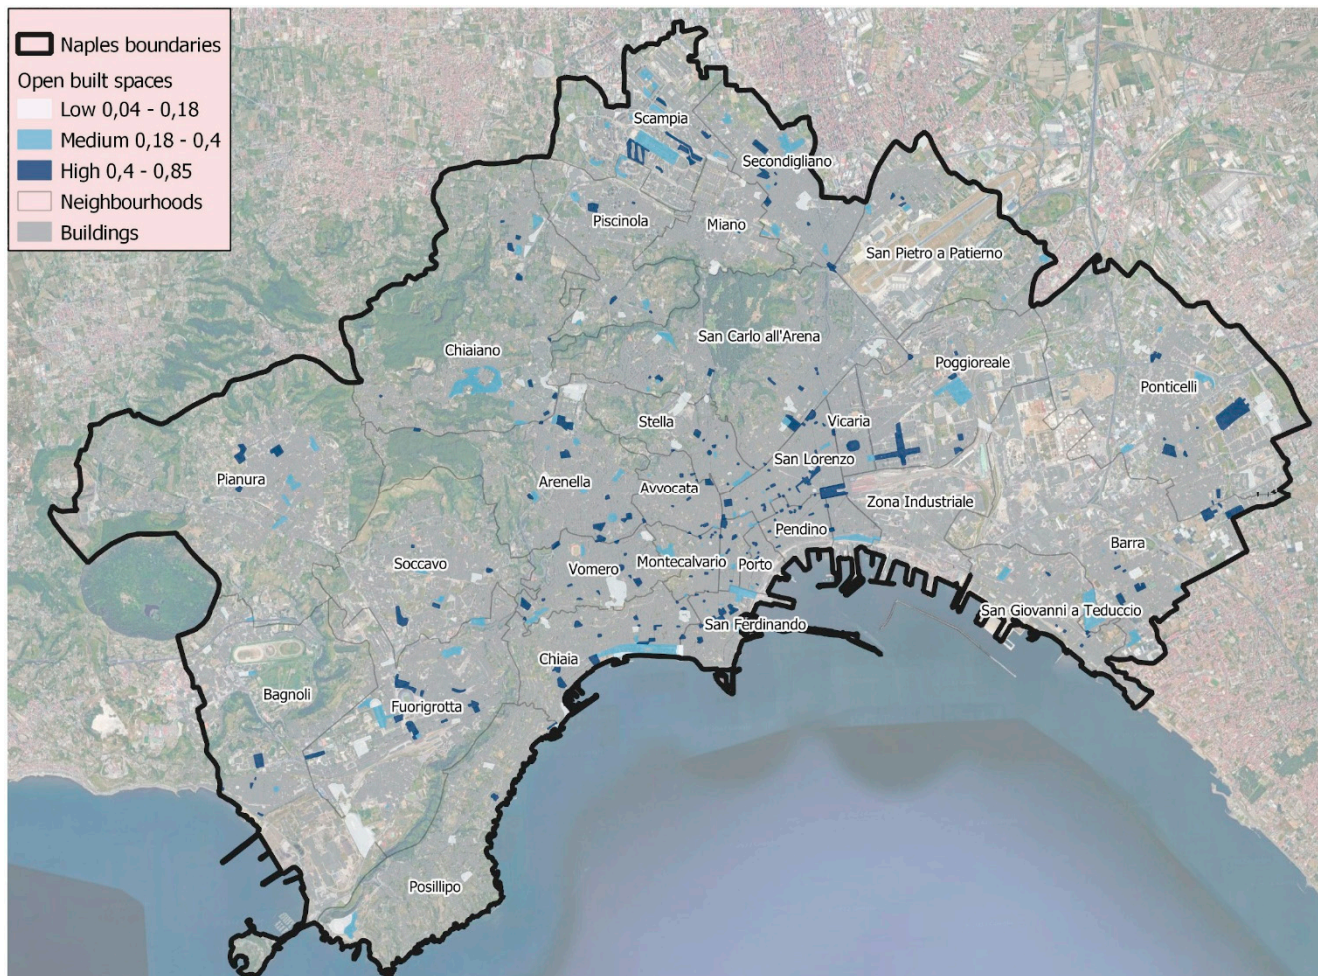

**Figure S1.** Classification of open spaces based on Runoff coefficients.



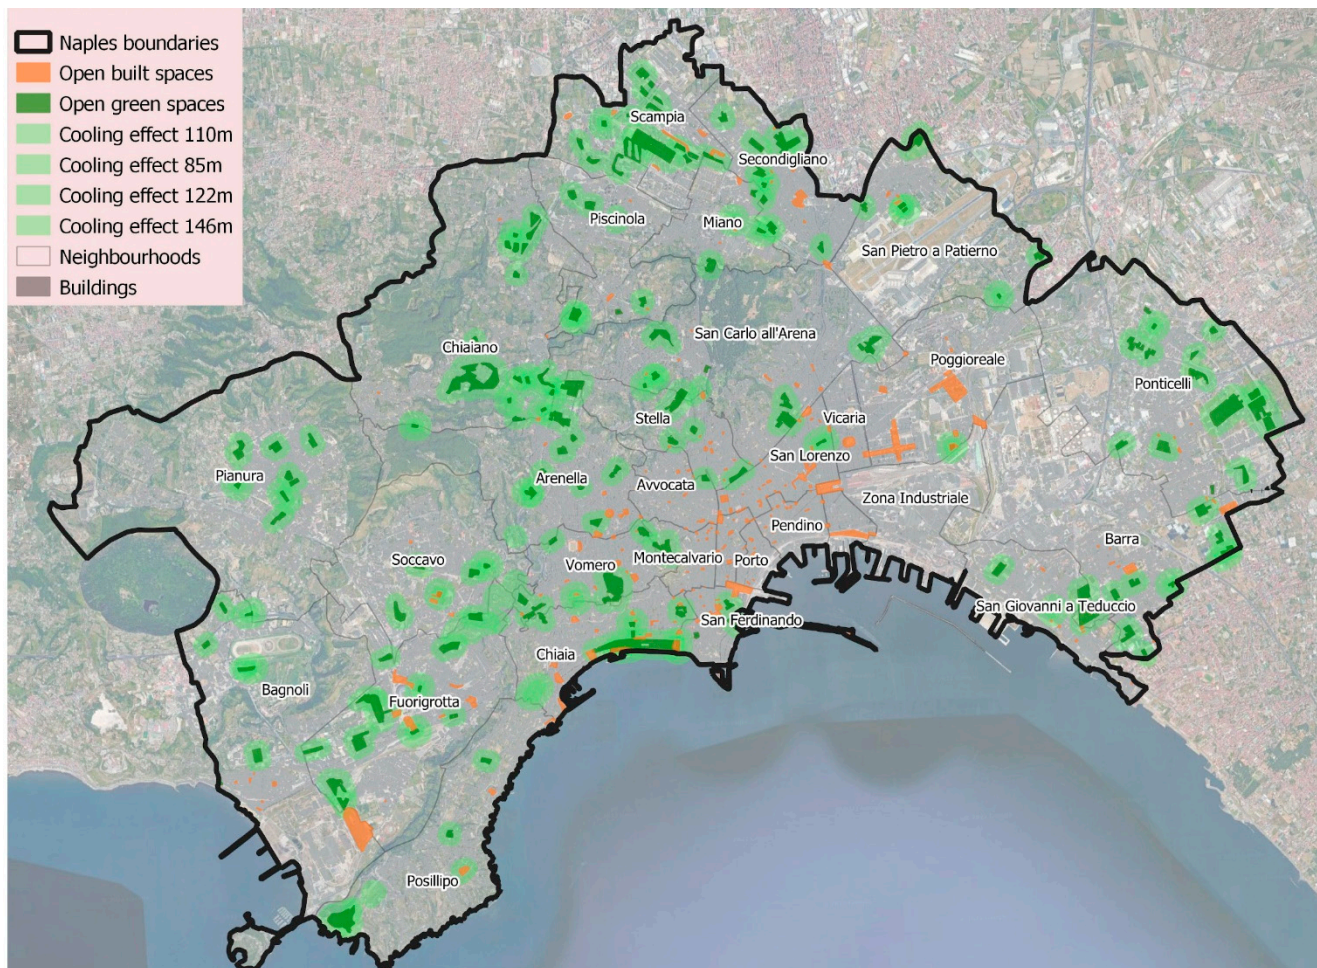

**Figure S2.** Classification of open spaces based on cooling effect, according to green areas dimensions and urban fabrics building density.

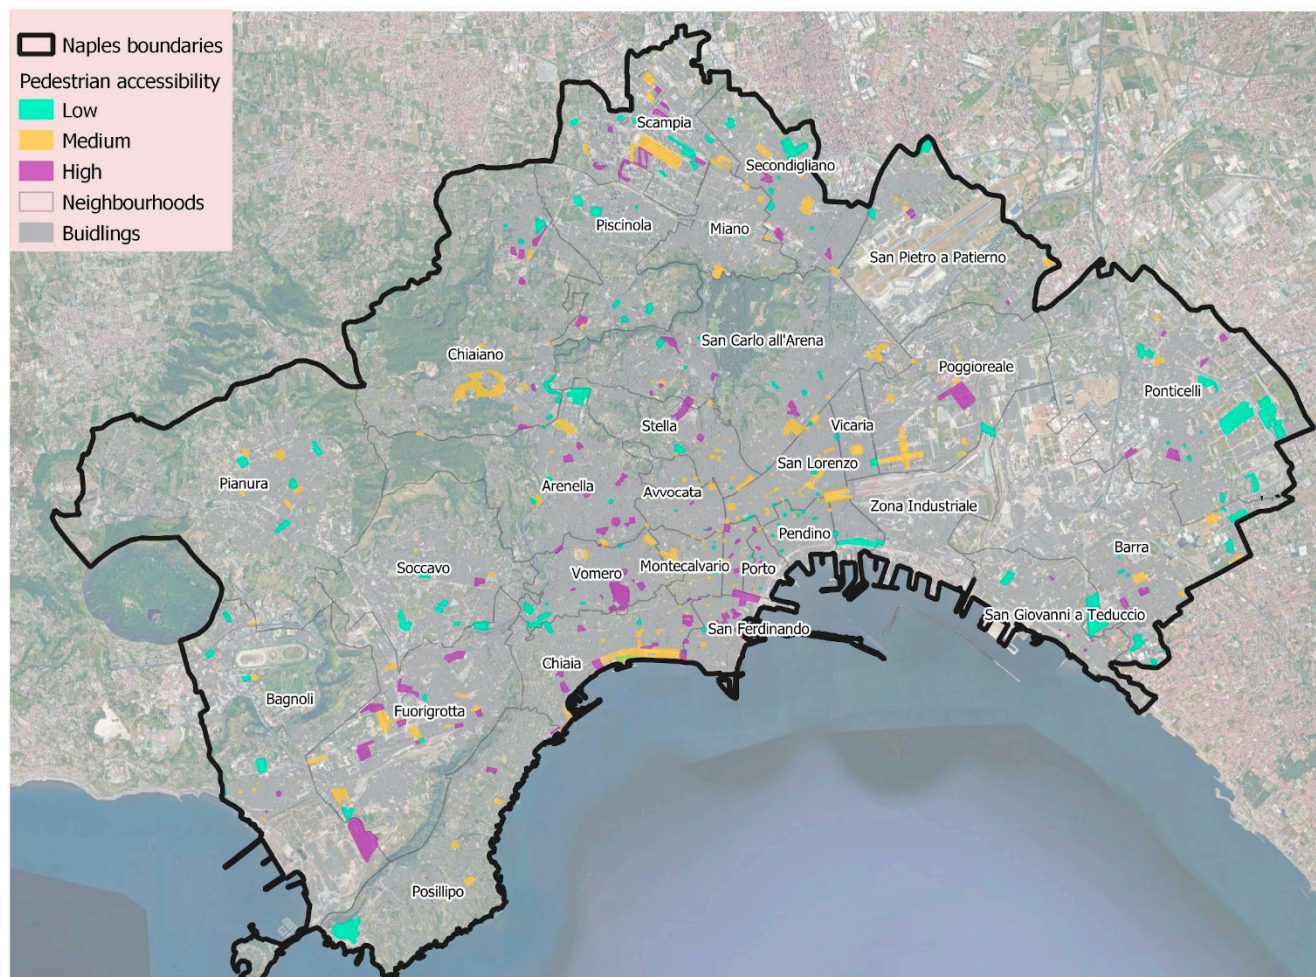

**Figure S3.** Classification of open spaces based on Pedestrian accessibility.



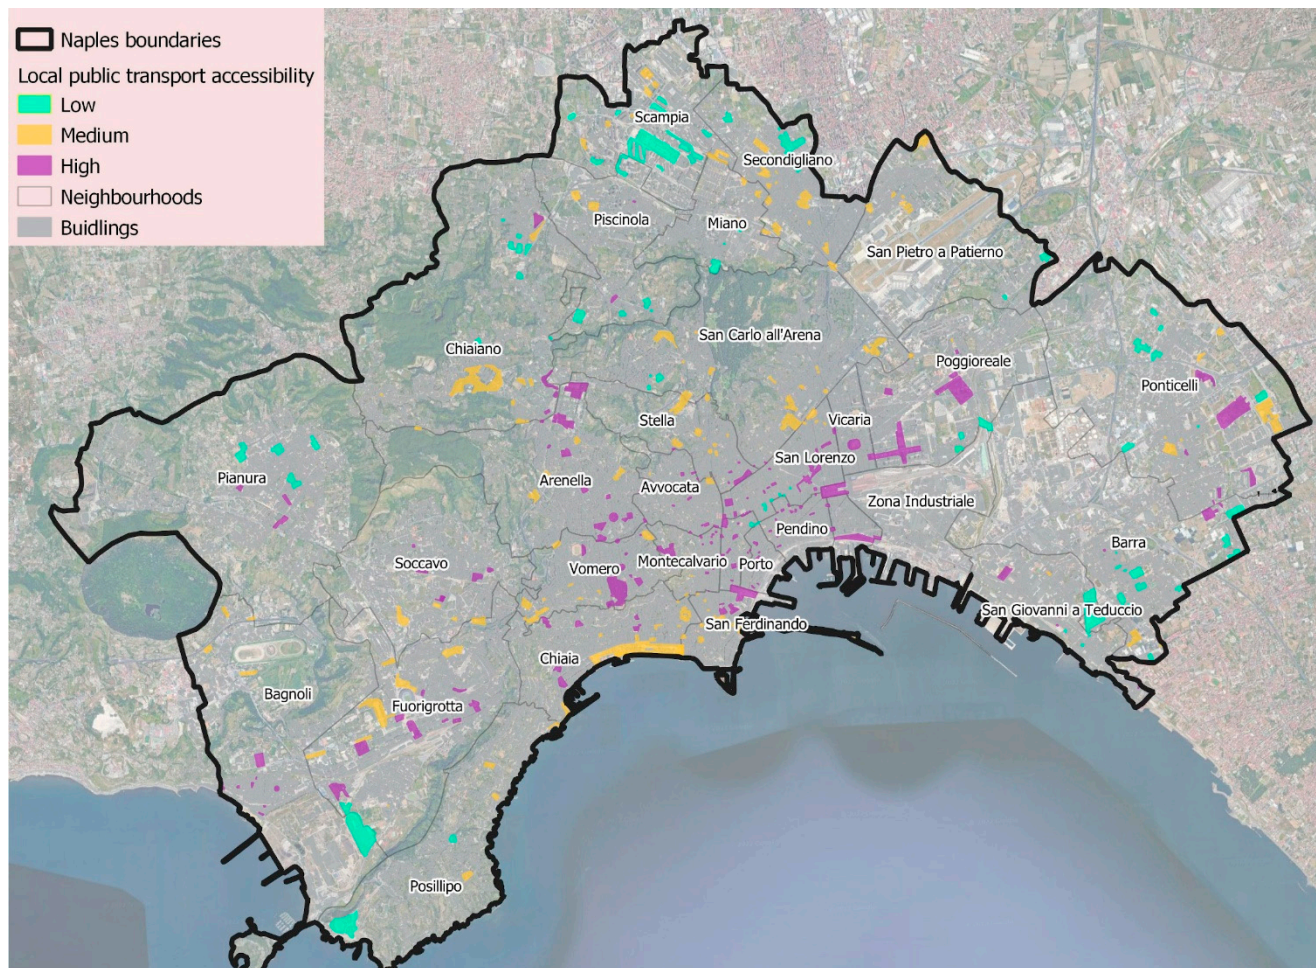

**Figure S4.** Classification of open spaces based on LPT accessibility.



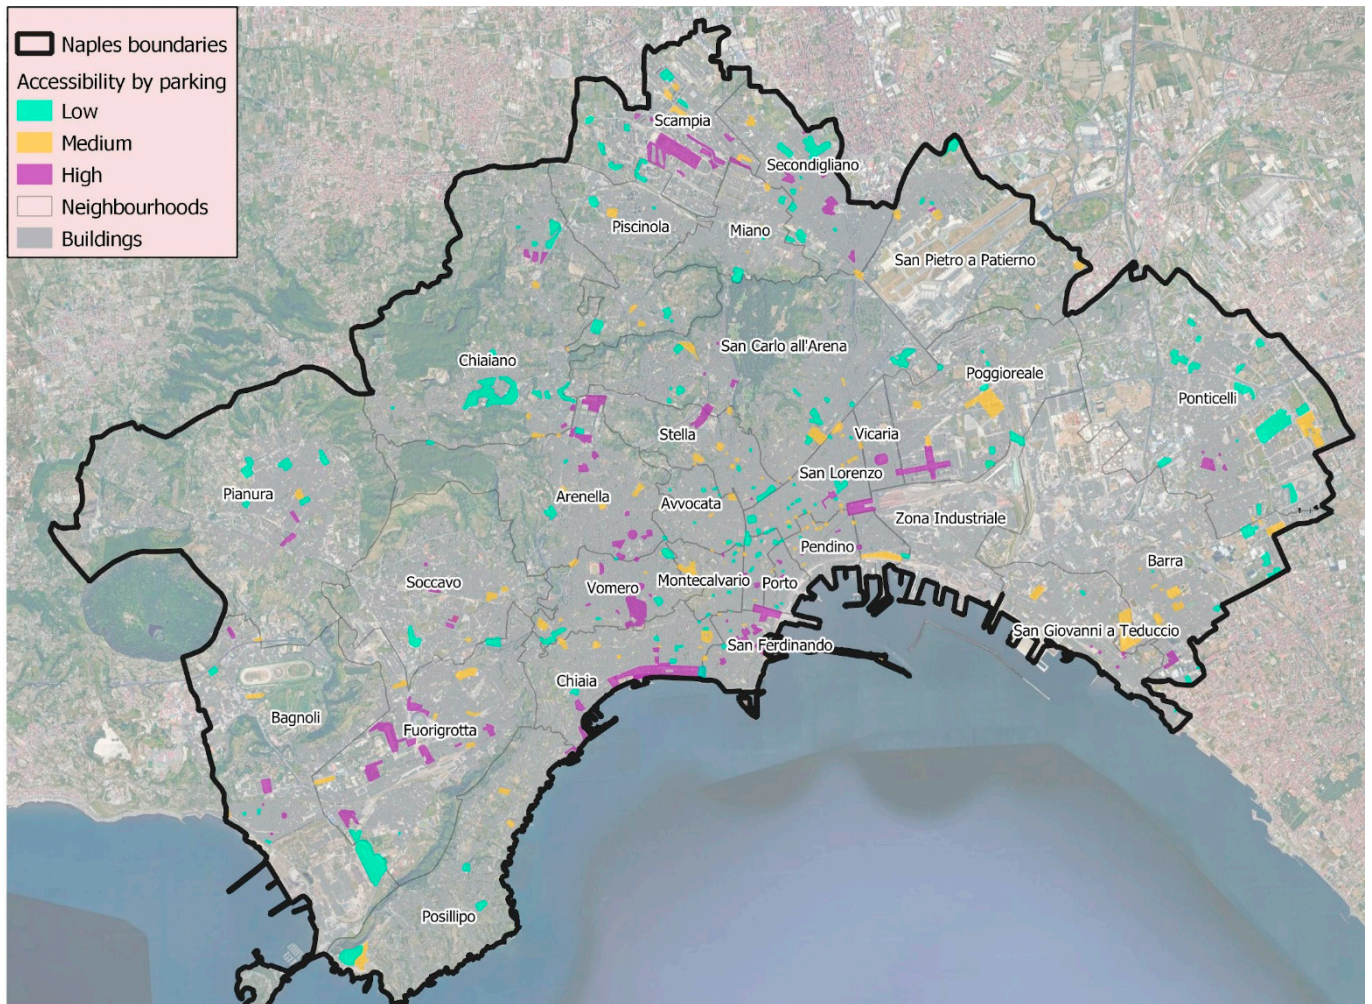

**Figure S5.** Classification of open spaces based on Parking supply accessibility.

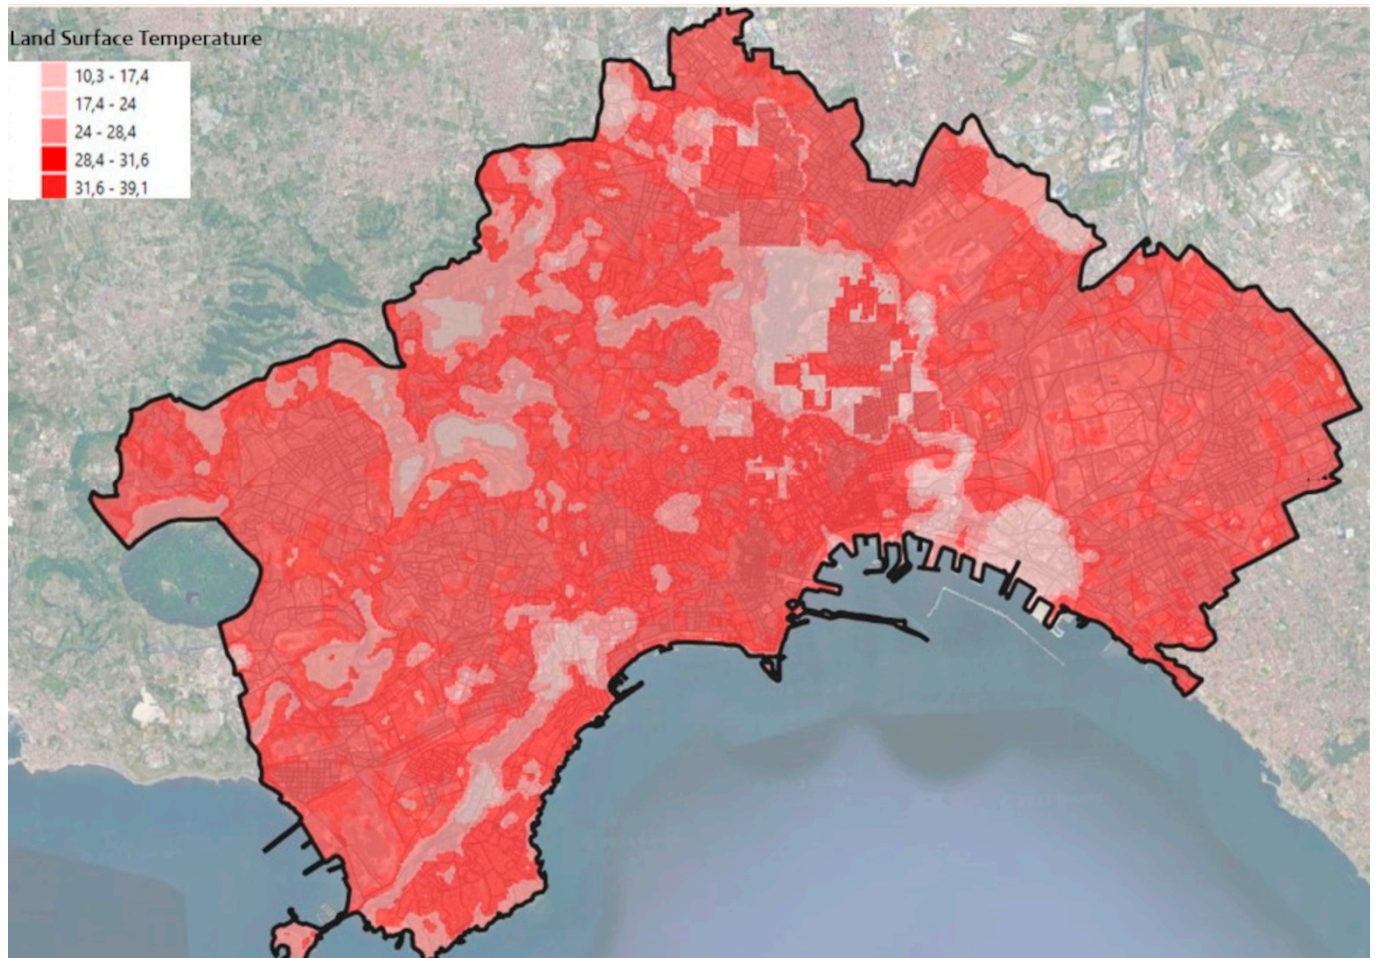

**Figure S6.** Land Surface Temperature (30x30m grid).



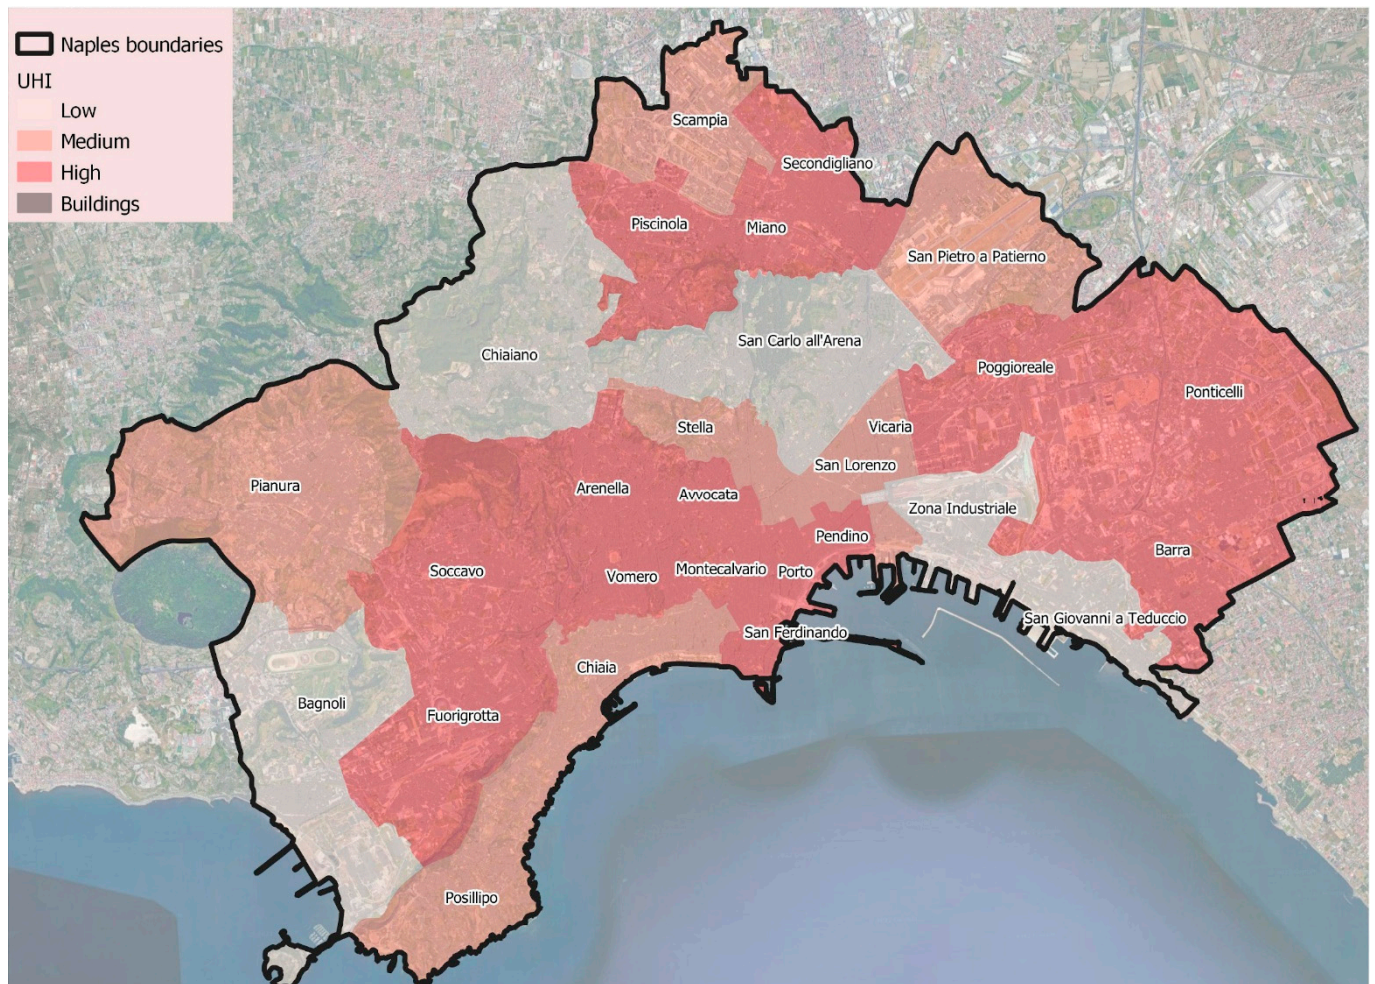

**Figure S7.** Classification of districts based on UHI levels.

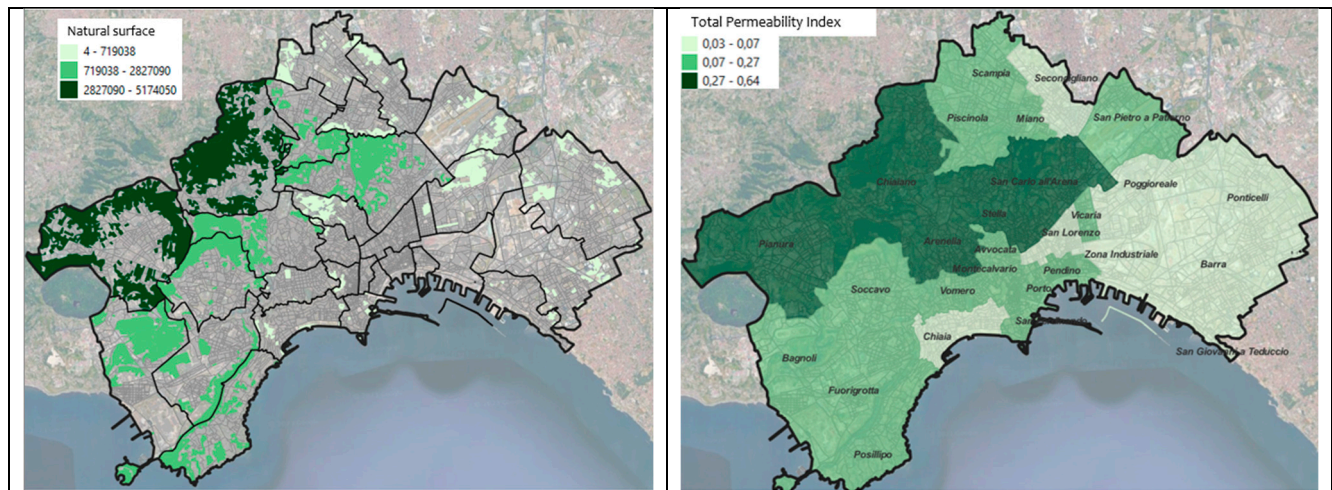



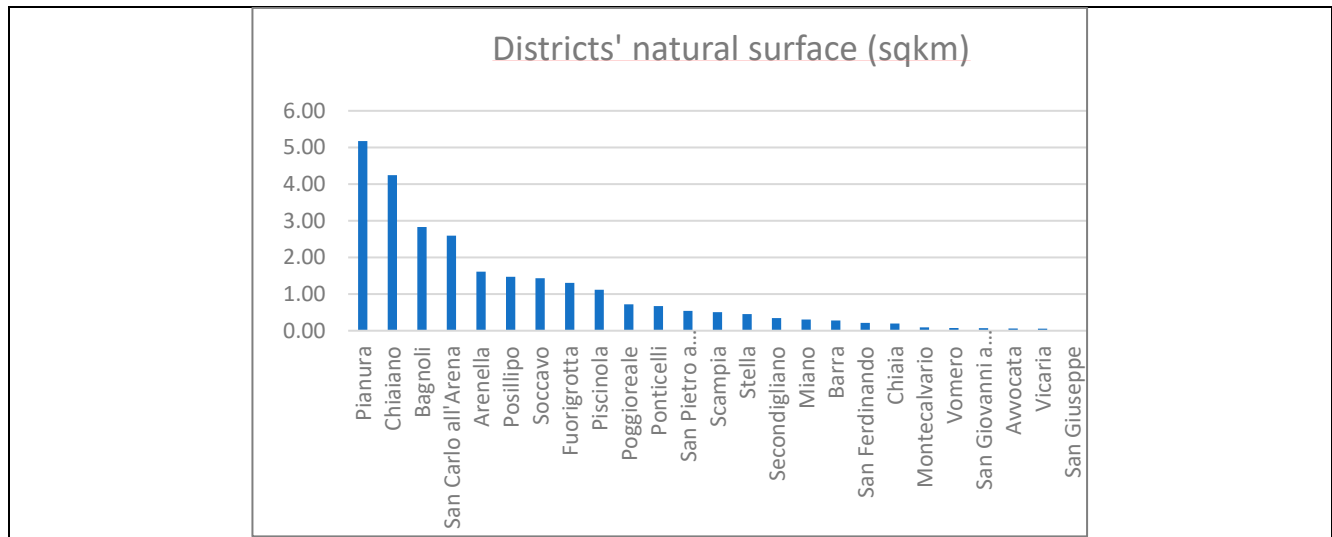

**Figure S8.** Amount of natural surfaces within districts and their classification based on  $IP_t$ .

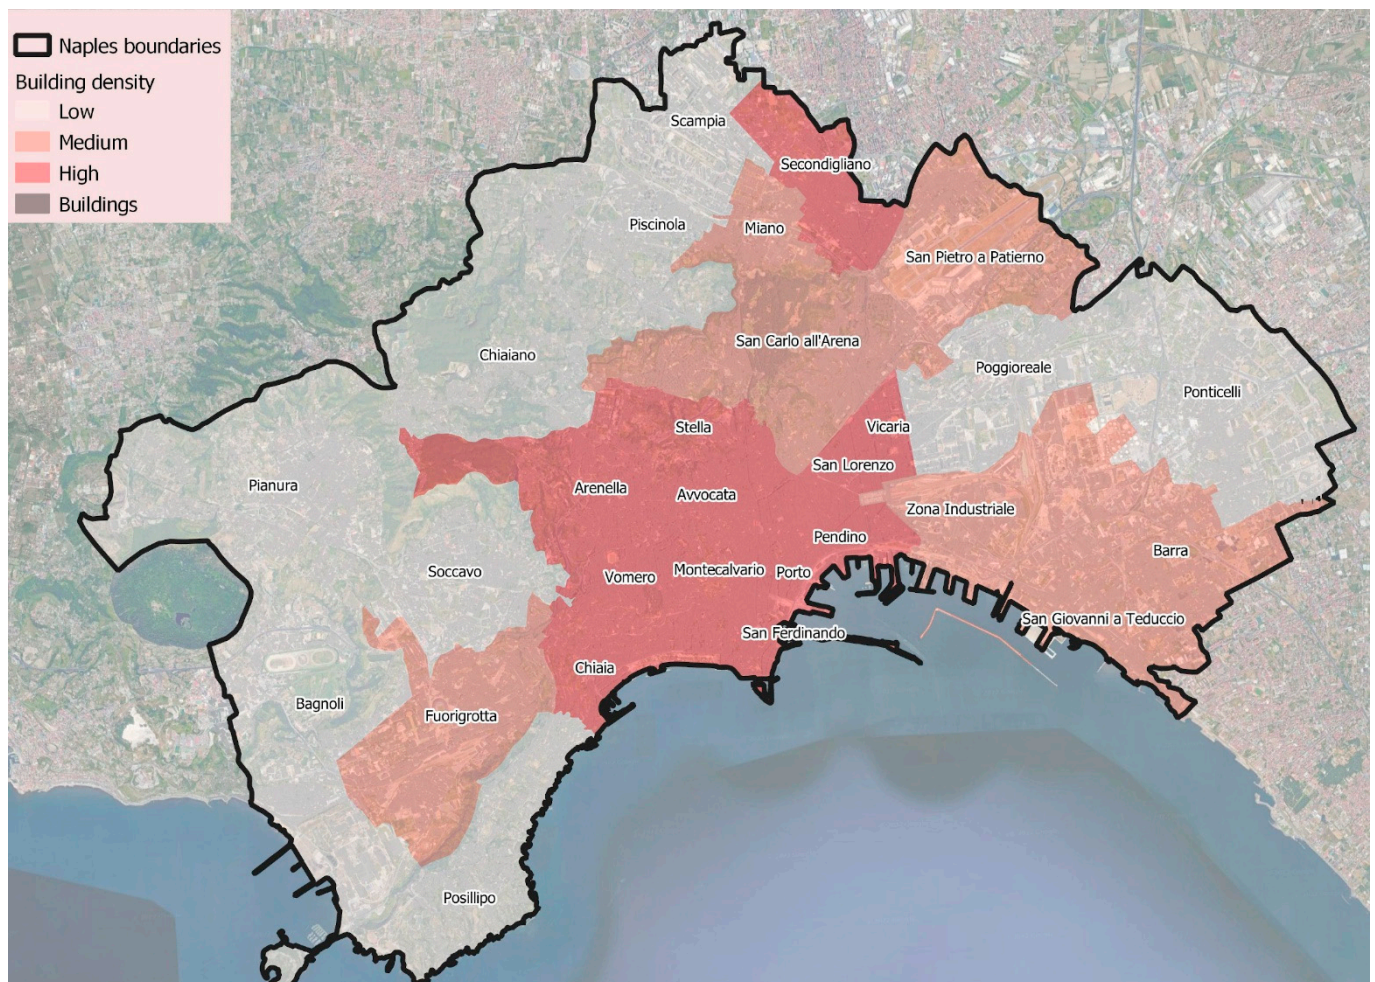

**Figure S9.** Classification of districts based on Building density.



|    | Neighbourhood           | IP <sub>t</sub> lower than the average value (0.194) | ITC <sub>t</sub> higher than the average value (0.433) |
|----|-------------------------|------------------------------------------------------|--------------------------------------------------------|
| 1  | Arenella                |                                                      | 0.61                                                   |
| 2  | Avvocata                | 0.091                                                | 0.643                                                  |
| 3  | Bagnoli                 | 0.162                                                |                                                        |
| 4  | Barra                   | 0.025                                                | 0.615                                                  |
| 5  | Chiaia                  | 0.045                                                |                                                        |
| 6  | Chiaiano                |                                                      |                                                        |
| 7  | Fuorigrotta             | 0.101                                                | 0.594                                                  |
| 8  | Mercato                 |                                                      |                                                        |
| 9  | Miano                   |                                                      | 0.538                                                  |
| 10 | Montecalvario           | 0.16                                                 | 0.801                                                  |
| 11 | Pendino                 | 0.131                                                | 0.835                                                  |
| 12 | Pianura                 |                                                      |                                                        |
| 13 | Piscinola               |                                                      | 0,525                                                  |
| 14 | Poggioreale             | 0,06                                                 | 0,525                                                  |
| 15 | Ponticelli              | 0,05                                                 | 0,554                                                  |
| 16 | Porto                   |                                                      |                                                        |
| 17 | Posillipo               |                                                      |                                                        |
| 18 | San Carlo all'Arena     |                                                      |                                                        |
| 19 | San Ferdinando          | 0.111                                                | 0.619                                                  |
| 20 | San Giovanni a Teduccio | 0.044                                                |                                                        |
| 21 | San Giuseppe            |                                                      | 0.661                                                  |
| 22 | San Lorenzo             | 0.061                                                | 0.75                                                   |
| 23 | San Pietro a Patierno   | 0.066                                                |                                                        |
| 24 | Scampia                 |                                                      |                                                        |
| 25 | Secondigliano           | 0.054                                                | 0.616                                                  |
| 26 | Soccavo                 |                                                      | 0.531                                                  |
| 27 | Stella                  |                                                      |                                                        |
| 28 | Vicaria                 | 0.16                                                 |                                                        |
| 29 | Vomero                  | 0.176                                                | 0.621                                                  |
| 30 | Zona Industriale        |                                                      |                                                        |

**Figure S10.** Naples neighbourhoods representing “warning areas” due to their permeability and thermal comfort values indexes.

**Characteristics of open spaces based on costs for climate adaptation interventions:**



| ID | Surface [sqm] | District       | Climate adaption intervention        | Estimated Cost [€] | Context area    |
|----|---------------|----------------|--------------------------------------|--------------------|-----------------|
| 1  | 109,65        | San Lorenzo    | filter strips                        | 9.868,41           | Historical ring |
| 2  | 188,73        | Montecalvario  | filter strips                        | 16.985,25          | Historical ring |
| 3  | 263,79        | Montecalvario  | filter strips                        | 23.741,37          | Historical ring |
| 4  | 284,39        | San Lorenzo    | filter strips                        | 25.594,83          | Historical ring |
| 5  | 302,75        | Avvocata       | rain garden                          | 8.477,08           | Historical ring |
| 6  | 303,21        | Pendino        | rain garden                          | 8.489,91           | Historical ring |
| 7  | 329,61        | Avvocata       | filter strips                        | 29.664,90          | Historical ring |
| 8  | 366,33        | Vomero         | bioretention areas                   | 17.583,89          | First ring      |
| 9  | 386,61        | Montecalvario  | filter strips                        | 34.794,99          | Historical ring |
| 10 | 392,90        | Montecalvario  | rain garden                          | 11.001,28          | Historical ring |
| 11 | 396,45        | Pendino        | rain garden                          | 11.100,66          | Historical ring |
| 12 | 404,69        | San Lorenzo    | parking garden                       | 16.997,15          | Historical ring |
| 13 | 443,28        | Avvocata       | bioretention areas                   | 21.373,44          | Historical ring |
| 14 | 453,73        | Pendino        | rain garden                          | 12.704,47          | Historical ring |
| 15 | 463,30        | Pendino        | rain garden                          | 13.028,40          | Historical ring |
| 16 | 468,55        | San Lorenzo    | filter strips                        | 42.169,14          | Historical ring |
| 17 | 468,77        | Pendino        | filter strips                        | 42.189,39          | Historical ring |
| 18 | 474,03        | San Lorenzo    | filter strips                        | 42.662,52          | Historical ring |
| 19 | 494,87        | San Ferdinando | filter strips                        | 44.537,94          | Historical ring |
| 20 | 558,67        | Pendino        | rain garden                          | 15.642,73          | Historical ring |
| 21 | 565,29        | Pendino        | filter strips                        | 50.876,37          | Historical ring |
| 22 | 577,55        | Avvocata       | bioretention areas                   | 27.722,35          | Historical ring |
| 23 | 615,56        | Pendino        | rain garden                          | 17.235,79          | Historical ring |
| 24 | 638,44        | Pendino        | filter strips                        | 57.459,78          | Historical ring |
| 25 | 638,52        | San Lorenzo    | filter strips                        | 57.466,98          | Historical ring |
| 26 | 646,03        | Barra          | rain garden                          | 18.088,92          | Peripheral ring |
| 27 | 657,87        | Pendino        | parking garden                       | 27.630,37          | Historical ring |
| 28 | 662,57        | Pendino        | filter strips                        | 59.631,03          | Historical ring |
| 29 | 726,68        | Vomero         | rain garden                          | 20.347,04          | First ring      |
| 30 | 732,06        | Pendino        | filter strips                        | 65.885,49          | Historical ring |
| 31 | 768,70        | Vomero         | bioretention areas                   | 36.897,50          | First ring      |
| 32 | 770,35        | Montecalvario  | rain garden                          | 21.569,86          | Historical ring |
| 33 | 780,34        | San Lorenzo    | filter strips                        | 70.230,96          | Historical ring |
| 34 | 799,41        | Montecalvario  | rain garden                          | 22.383,59          | Historical ring |
| 35 | 823,89        | Pendino        | filter strips                        | 74.150,19          | Historical ring |
| 36 | 874,73        | Vomero         | bioretention areas                   | 41.987,14          | First ring      |
| 37 | 885,77        | Pendino        | rain garden                          | 24.801,62          | Historical ring |
| 38 | 887,06        | San Lorenzo    | filter strips                        | 79.835,58          | Historical ring |
| 39 | 891,25        | San Lorenzo    | rain garden                          | 24.955,00          | Historical ring |
| 40 | 906,62        | Avvocata       | filter strips                        | 81.595,62          | Historical ring |
| 41 | 924,17        | San Lorenzo    | filter strips                        | 83.175,57          | Historical ring |
| 42 | 1.012,56      | Montecalvario  | rain garden                          | 28.351,62          | Historical ring |
| 43 | 1.099,31      | Vomero         | filter strips                        | 98.937,81          | First ring      |
| 44 | 1.100,03      | San Lorenzo    | rain garden                          | 30.800,73          | Historical ring |
| 45 | 1.155,04      | Pendino        | filter strips                        | 103.953,69         | Historical ring |
| 46 | 1.173,49      | San Lorenzo    | parking garden                       | 49.286,50          | Historical ring |
| 47 | 1.213,14      | San Lorenzo    | rain garden                          | 33.967,78          | Historical ring |
| 48 | 1.273,84      | Avvocata       | rain garden                          | 35.667,60          | Historical ring |
| 49 | 1.304,90      | Pendino        | parking garden                       | 54.805,93          | Historical ring |
| 50 | 1.350,54      | Montecalvario  | filter strips                        | 121.548,51         | Historical ring |
| 51 | 1.401,48      | Avvocata       | filter strips                        | 126.133,02         | Historical ring |
| 52 | 1.639,47      | Pendino        | rain garden                          | 45.905,08          | Historical ring |
| 53 | 1.643,94      | Avvocata       | filter strips                        | 147.954,33         | Historical ring |
| 54 | 1.707,33      | San Lorenzo    | filter strips                        | 153.659,70         | Historical ring |
| 55 | 1.775,09      | Avvocata       | bioretention areas                   | 56.802,91          | Historical ring |
| 56 | 1.837,22      | San Lorenzo    | rain garden                          | 51.442,19          | Historical ring |
| 57 | 1.839,17      | San Ferdinando | rain garden                          | 51.496,82          | Historical ring |
| 58 | 1.864,44      | Montecalvario  | filter strips                        | 167.799,60         | Historical ring |
| 59 | 1.926,56      | Barra          | rain garden                          | 53.943,74          | Peripheral ring |
| 60 | 1.944,51      | Fuorigrotta    | bioretention areas                   | 62.224,22          | Peripheral ring |
| 61 | 2.069,04      | San Lorenzo    | filter strips                        | 186.213,33         | Historical ring |
| 62 | 2.179,46      | Avvocata       | parking garden                       | 52.307,06          | Historical ring |
| 63 | 2.713,25      | Pendino        | parking garden                       | 65.117,95          | Historical ring |
| 64 | 3.228,01      | Fuorigrotta    | rain garden                          | 90.384,22          | Peripheral ring |
| 65 | 3.463,71      | San Ferdinando | rain garden                          | 96.983,82          | Historical ring |
| 66 | 3.726,93      | Pendino        | filter strips                        | 335.423,97         | Historical ring |
| 67 | 3.770,04      | Poggioreale    | bioretention areas                   | 120.641,34         | Peripheral ring |
| 68 | 4.945,77      | Fuorigrotta    | rain garden                          | 138.481,42         | Peripheral ring |
| 69 | 6.321,09      | Poggioreale    | bioretention areas                   | 202.274,88         | Peripheral ring |
| 70 | 7.394,53      | Vomero         | bioretention areas and filter strips | 902.132,78         | First ring      |
| 71 | 7.744,56      | Pendino        | rain garden                          | 216.847,57         | Historical ring |
| 72 | 8.070,28      | San Lorenzo    | bioretention areas                   | 258.249,02         | Historical ring |
| 73 | 8.395,37      | Secondigliano  | filter strips and rain garden        | 990.653,42         | Peripheral ring |
| 74 | 24.565,03     | Fuorigrotta    | parking garden                       | 1.621.292,18       | Peripheral ring |
| 75 | 26.638,03     | Barra          | water square                         | 3.995.704,50       | Peripheral ring |
| 76 | 35.467,85     | Poggioreale    | rain garden                          | 993.099,74         | Peripheral ring |
| 77 | 85.951,13     | Poggioreale    | water square                         | 12.892.669,80      | Peripheral ring |

26.045.693,30

Figure S11. Proposed adaptation interventions for increasing permeability and related estimated costs.

| ID | Surface [sqm] | District       | Climate adaption intervention    | Estimated Cost [€] | Context area    |
|----|---------------|----------------|----------------------------------|--------------------|-----------------|
| 1  | 248,63        | Barra          | greening                         | 11.380,53          | Peripheral ring |
| 2  | 289,28        | Vomero         | greening                         | 13.209,78          | First ring      |
| 3  | 19.104,92     | Barra          | greening                         | 860.361,58         | Peripheral ring |
| 4  | 6.017,33      | Vomero         | greening                         | 271.163,67         | First ring      |
| 5  | 653,90        | Vomero         | greening                         | 29.809,59          | First ring      |
| 6  | 13.416,13     | San Ferdinando | greening                         | 603.981,85         | Historical ring |
| 7  | 8.962,93      | Fuorigrotta    | greening                         | 403.907,63         | Peripheral ring |
| 8  | 2.534,14      | Vomero         | greening                         | 114.420,35         | First ring      |
| 9  | 1.932,27      | Fuorigrotta    | greening                         | 87.335,93          | Peripheral ring |
| 10 | 52,53         | Montecalvario  | greening                         | 2.428,03           | Historical ring |
| 11 | 59,11         | Montecalvario  | greening                         | 3.043,73           | Historical ring |
| 12 | 78,02         | San Ferdinando | greening                         | 3.894,81           | Historical ring |
| 13 | 353,62        | Fuorigrotta    | greening                         | 16.296,81          | Peripheral ring |
| 14 | 94,05         | Montecalvario  | greening                         | 4.296,25           | Historical ring |
| 15 | 339,53        | San Ferdinando | greening                         | 15.342,90          | Historical ring |
| 16 | 1.150,11      | Secondigliano  | greening                         | 52.139,13          | Peripheral ring |
| 17 | 1.733,07      | Secondigliano  | greening                         | 78.372,33          | Peripheral ring |
| 18 | 1.606,77      | Secondigliano  | greening                         | 72.688,52          | Peripheral ring |
| 19 | 31.273,59     | Secondigliano  | greening                         | 1.408.271,42       | Peripheral ring |
| 20 | 962,04        | Vomero         | greening                         | 43.675,89          | First ring      |
| 21 | 2.841,12      | Fuorigrotta    | increasing the presence of trees | 12.820,92          | Peripheral ring |
| 22 | 3.779,97      | San Lorenzo    | increasing the presence of trees | 16.951,86          | Historical ring |
| 23 | 10.771,52     | Fuorigrotta    | increasing the presence of trees | 47.842,70          | Peripheral ring |
| 24 | 13.229,43     | Fuorigrotta    | increasing the presence of trees | 58.657,50          | Peripheral ring |
| 25 | 13.418,23     | Vomero         | increasing the presence of trees | 59.360,20          | First ring      |
| 26 | 13.442,93     | Vomero         | increasing the presence of trees | 59.596,89          | First ring      |
| 27 | 17.594,65     | Fuorigrotta    | increasing the presence of trees | 77.864,46          | Peripheral ring |
| 28 | 18.507,79     | Vomero         | increasing the presence of trees | 81.882,28          | First ring      |
| 29 | 30.742,18     | Vomero         | increasing the presence of trees | 135.713,57         | First ring      |
| 30 | 32.083,21     | Fuorigrotta    | increasing the presence of trees | 141.614,10         | Peripheral ring |
| 31 | 39.463,07     | Fuorigrotta    | increasing the presence of trees | 174.085,51         | Peripheral ring |

**4.962.410,70**

**Figure S12.** Proposed adaptation interventions for improving thermal comfort and related estimated costs.



| ID | Surface [sqm] | District       | Climate adaption intervention            | Estimated Cost [€] | Context ring    |
|----|---------------|----------------|------------------------------------------|--------------------|-----------------|
| 1  | 45010,06      | San Ferdinando | rain gardens                             | 1.890.422,52       | Historical ring |
| 2  | 537,949       | San Lorenzo    | parking gardens                          | 23.669,76          | Historical ring |
| 3  | 487,013       | San Lorenzo    | rain gardens                             | 33.896,10          | Historical ring |
| 4  | 2364,849      | San Lorenzo    | bioretention area                        | 75.675,17          | Historical ring |
| 5  | 2006,34       | San Lorenzo    | increasing presence of trees             | 2.270,86           | Historical ring |
| 6  | 1086,697      | Montecalvario  | rain gardens                             | 75.634,11          | Historical ring |
| 7  | 1182,671      | San Lorenzo    | bioretention area                        | 37.845,47          | Historical ring |
| 8  | 10536,703     | San Lorenzo    | increasing presence of trees             | 4.909,47           | Historical ring |
| 9  | 2021,068      | San Ferdinando | rain gardens                             | 140.666,33         | Historical ring |
| 10 | 545,403       | San Ferdinando | rain gardens                             | 37.960,05          | Historical ring |
| 11 | 730,935       | Montecalvario  | rain gardens                             | 30.699,27          | Historical ring |
| 12 | 1395,408      | San Lorenzo    | increasing presence of trees             | 2.527,77           | Historical ring |
| 13 | 361,155       | San Lorenzo    | bioretention area                        | 11.556,96          | Historical ring |
| 14 | 3149,29       | San Ferdinando | increasing presence of trees             | 6.267,80           | Historical ring |
| 15 | 844,992       | San Lorenzo    | bioretention area                        | 27.039,74          | Historical ring |
| 16 | 5142,635      | Vomero         | increasing presence of trees             | 13.984,88          | First ring      |
| 17 | 5366,675      | Fuorigrotta    | increasing presence of trees             | 3.845,96           | Peripheral ring |
| 18 | 8827,36       | Barra          | increasing presence of trees             | 22.755,59          | Peripheral ring |
| 19 | 8822,319      | Fuorigrotta    | permeable surfaces and bioretention area | 727.841,32         | Peripheral ring |
| 20 | 13229,431     | Fuorigrotta    | bioretention area                        | 423.341,79         | Peripheral ring |
| 21 | 13299,431     | Fuorigrotta    | permeable surfaces                       | 162.918,03         | Peripheral ring |
| 22 | 26888,617     | Fuorigrotta    | increasing presence of trees             | 58.337,50          | Peripheral ring |
| 23 | 4683,992      | Secondigliano  | increase presence of trees               | 58.901,50          | Peripheral ring |
| 24 | 15527,809     | Ponticelli     | increasing presence of trees             | 118.437,91         | Peripheral ring |
| 25 | 3755,27       | Barra          | increase presence of trees               | 20.865,56          | Peripheral ring |
| 26 | 10938,554     | Ponticelli     | bioretention area                        | 350.033,73         | Peripheral ring |
| 27 | 11538,524     | Fuorigrotta    | permeable surfaces                       | 141.346,92         | Peripheral ring |
| 28 | 5140,088      | Ponticelli     | permeable surfaces                       | 62.966,08          | Peripheral ring |
| 29 | 14983,65      | San Ferdinando | permeable surfaces                       | 183.549,71         | Historical ring |
| 30 | 12329,242     | Fuorigrotta    | bioretention area                        | 394.535,74         | Peripheral ring |
| 31 | 7058,815      | Avvocata       | increasing presence of trees             | 66.312,06          | Historical ring |
| 32 | 4427,595      | Barra          | increasing presence of trees             | 54.632,66          | Peripheral ring |
| 33 | 13466,578     | Secondigliano  | increasing presence of trees             | 31.442,79          | Peripheral ring |
| 34 | 13466,578     | Secondigliano  | increase presence of trees               | 19.865,42          | Peripheral ring |
| 35 | 25801,662     | Ponticelli     | increase presence of trees               | 59.636,94          | Peripheral ring |
| 36 | 5753,299      | Ponticelli     | permeable surfaces and bioretention area | 312.116,47         | Peripheral ring |
| 37 | 28089,598     | Fuorigrotta    | increasing presence of trees             | 837,46             | Peripheral ring |
| 38 | 7640,748      | Secondigliano  | increasing presence of trees             | 15.473,50          | Peripheral ring |
| 39 | 13526,487     | Fuorigrotta    | increase presence of trees               | 123.978,23         | Peripheral ring |
| 40 | 23053,205     | Ponticelli     | increasing presence of trees             | 34.003,29          | Peripheral ring |
| 41 | 3172,22       | Barra          | permeable surfaces                       | 33.308,31          | Peripheral ring |
| 42 | 3172,22       | Ponticelli     | increasing presence of trees             | 101.818,10         | Peripheral ring |
| 43 | 4840,491      | Barra          | permeable surfaces and bioretention area | 166.996,94         | Peripheral ring |
| 44 | 28357,89      | San Ferdinando | increase presence of trees               | 837,46             | Historical ring |
| 45 | 7289,342      | Ponticelli     | rain gardens                             | 306.152,36         | Peripheral ring |
| 46 | 9831,806      | San Ferdinando | increase presence of trees               | 125.158,72         | Historical ring |
| 47 | 11518,497     | Barra          | permeable surfaces                       | 120.944,22         | Peripheral ring |
| 48 | 11518,53      | Barra          | increasing presence of trees             | 43.643,95          | Peripheral ring |
| 49 | 5766,92       | Barra          | increase presence of trees               | 51.065,39          | Peripheral ring |
| 50 | 16777,536     | Ponticelli     | increasing presence of trees             | 51.065,53          | Peripheral ring |
| 51 | 6792,214      | Secondigliano  | increase presence of trees               | 25.758,45          | Peripheral ring |
| 52 | 20591,567     | Ponticelli     | increasing presence of trees             | 74.205,16          | Peripheral ring |
| 53 | 5129,799      | Ponticelli     | increase presence of trees               | 30.269,74          | Peripheral ring |
| 54 | 5129,799      | Ponticelli     | increasing presence of trees             | 90.986,89          | Peripheral ring |
| 55 | 21023,591     | Barra          | increasing presence of trees             | 22.955,12          | Peripheral ring |
| 56 | 5090,618      | Barra          | increasing presence of trees             | 22.955,12          | Peripheral ring |
| 57 | 2385,66       | Fuorigrotta    | increasing presence of trees             | 92.887,80          | Peripheral ring |
| 58 | 3047,322      | Secondigliano  | increase presence of trees               | 22.782,72          | Peripheral ring |
| 59 | 11652,30      | Fuorigrotta    | parking gardens                          | 512.701,16         | Peripheral ring |

7.759.495,55

**Figure S13.** Proposed adaptation interventions for improving permeability and thermal comfort and related estimated costs.

| ID | Surface [sqm] | District       | Climate adaption intervention        | Estimated Cost [€] | Context area    | dimensional weight of open space % | economic weight of open space % | Δ       |
|----|---------------|----------------|--------------------------------------|--------------------|-----------------|------------------------------------|---------------------------------|---------|
| 77 | 85,951,13     | Poggioreale    | water square                         | 12,892,669,80      | Peripheral ring | 29,82%                             | 49,50%                          | -19,68% |
| 75 | 26,638,03     | Barra          |                                      | 3,995,704,50       | Peripheral ring | 9,24%                              | 15,34%                          | -6,10%  |
| 76 | 35,467,85     | Poggioreale    |                                      | 993,099,74         | Peripheral ring | 12,31%                             | 3,81%                           | 8,49%   |
| 71 | 7,744,56      | Pendino        |                                      | 216,847,57         | Historical ring | 2,69%                              | 0,83%                           | 1,85%   |
| 68 | 4,945,77      | Fuorigrotta    |                                      | 13,848,142         | Peripheral ring | 1,72%                              | 0,53%                           | 1,18%   |
| 65 | 3,463,71      | San Ferdinando |                                      | 96,983,82          | Historical ring | 1,20%                              | 0,37%                           | 0,83%   |
| 64 | 3,228,01      | Fuorigrotta    |                                      | 90,384,22          | Peripheral ring | 1,12%                              | 0,35%                           | 0,77%   |
| 59 | 1,926,56      | Barra          |                                      | 53,943,74          | Peripheral ring | 0,67%                              | 0,21%                           | 0,46%   |
| 57 | 1,839,17      | San Ferdinando |                                      | 51,496,82          | Historical ring | 0,64%                              | 0,20%                           | 0,44%   |
| 56 | 1,837,22      | San Lorenzo    |                                      | 51,442,19          | Historical ring | 0,64%                              | 0,20%                           | 0,44%   |
| 52 | 1,639,47      | Pendino        | rain garden                          | 45,905,08          | Historical ring | 0,57%                              | 0,18%                           | 0,39%   |
| 48 | 1,273,84      | Avvocata       |                                      | 35,667,60          | Historical ring | 0,44%                              | 0,14%                           | 0,31%   |
| 47 | 1,213,14      | San Lorenzo    |                                      | 33,967,78          | Historical ring | 0,42%                              | 0,13%                           | 0,29%   |
| 44 | 1,100,03      | San Lorenzo    |                                      | 30,800,73          | Historical ring | 0,38%                              | 0,12%                           | 0,26%   |
| 42 | 1,012,56      | Montecalvario  |                                      | 28,351,62          | Historical ring | 0,35%                              | 0,11%                           | 0,24%   |
| 39 | 891,25        | San Lorenzo    |                                      | 24,955,00          | Historical ring | 0,31%                              | 0,10%                           | 0,21%   |
| 37 | 885,77        | Pendino        |                                      | 24,801,62          | Historical ring | 0,31%                              | 0,10%                           | 0,21%   |
| 34 | 799,41        | Montecalvario  |                                      | 22,383,59          | Historical ring | 0,28%                              | 0,09%                           | 0,19%   |
| 32 | 770,35        | Montecalvario  |                                      | 21,569,86          | Historical ring | 0,27%                              | 0,08%                           | 0,18%   |
| 29 | 726,68        | Vomero         |                                      | 20,347,04          | First ring      | 0,25%                              | 0,08%                           | 0,17%   |
| 26 | 646,03        | Barra          |                                      | 18,088,92          | Peripheral ring | 0,22%                              | 0,07%                           | 0,15%   |
| 23 | 615,56        | Pendino        |                                      | 17,235,79          | Historical ring | 0,21%                              | 0,07%                           | 0,15%   |
| 20 | 558,67        | Pendino        |                                      | 15,642,73          | Historical ring | 0,19%                              | 0,06%                           | 0,13%   |
| 15 | 465,30        | Pendino        |                                      | 13,028,40          | Historical ring | 0,16%                              | 0,05%                           | 0,11%   |
| 14 | 433,73        | Pendino        |                                      | 12,704,47          | Historical ring | 0,16%                              | 0,05%                           | 0,11%   |
| 11 | 396,45        | Pendino        |                                      | 11,100,66          | Historical ring | 0,14%                              | 0,04%                           | 0,09%   |
| 10 | 392,90        | Montecalvario  |                                      | 11,001,28          | Historical ring | 0,14%                              | 0,04%                           | 0,09%   |
| 6  | 303,21        | Pendino        |                                      | 8,489,91           | Historical ring | 0,11%                              | 0,03%                           | 0,07%   |
| 5  | 302,75        | Avvocata       |                                      | 8,477,08           | Historical ring | 0,11%                              | 0,03%                           | 0,07%   |
| 74 | 245,65,03     | Fuorigrotta    | parking garden                       | 1,621,292,18       | Peripheral ring | 8,52%                              | 6,22%                           | 2,30%   |
| 63 | 2,713,25      | Pendino        |                                      | 65,117,95          | Historical ring | 0,94%                              | 0,25%                           | 0,69%   |
| 62 | 2,179,46      | Avvocata       |                                      | 52,307,06          | Historical ring | 0,76%                              | 0,20%                           | 0,56%   |
| 49 | 1,304,90      | Pendino        |                                      | 54,805,93          | Historical ring | 0,45%                              | 0,21%                           | 0,24%   |
| 46 | 1,173,49      | San Lorenzo    |                                      | 49,286,50          | Historical ring | 0,41%                              | 0,19%                           | 0,22%   |
| 27 | 657,87        | Pendino        |                                      | 27,630,37          | Historical ring | 0,23%                              | 0,11%                           | 0,12%   |
| 12 | 404,69        | San Lorenzo    |                                      | 16,997,15          | Historical ring | 0,14%                              | 0,07%                           | 0,08%   |
| 72 | 8,070,28      | San Lorenzo    |                                      | 25,824,90,02       | Historical ring | 2,80%                              | 0,99%                           | 1,81%   |
| 69 | 6,321,09      | Poggioreale    |                                      | 202,274,88         | Peripheral ring | 2,19%                              | 0,78%                           | 1,42%   |
| 67 | 3,770,04      | Poggioreale    |                                      | 120,641,34         | Peripheral ring | 1,31%                              | 0,46%                           | 0,84%   |
| 60 | 1,944,51      | Fuorigrotta    | bioretention areas                   | 62,224,22          | Peripheral ring | 0,67%                              | 0,24%                           | 0,44%   |
| 55 | 1,775,09      | Avvocata       |                                      | 56,802,91          | Historical ring | 0,62%                              | 0,22%                           | 0,40%   |
| 36 | 874,73        | Vomero         |                                      | 41,987,14          | First ring      | 0,30%                              | 0,16%                           | 0,14%   |
| 31 | 768,70        | Vomero         |                                      | 36,897,50          | First ring      | 0,27%                              | 0,14%                           | 0,13%   |
| 22 | 577,55        | Avvocata       |                                      | 27,722,35          | Historical ring | 0,20%                              | 0,11%                           | 0,09%   |
| 13 | 445,28        | Avvocata       |                                      | 21,373,44          | Historical ring | 0,15%                              | 0,08%                           | 0,07%   |
| 8  | 366,33        | Vomero         |                                      | 17,583,89          | First ring      | 0,13%                              | 0,07%                           | 0,06%   |
| 66 | 3,726,93      | Pendino        |                                      | 335,423,97         | Historical ring | 1,29%                              | 1,29%                           | 0,01%   |
| 61 | 2,069,04      | San Lorenzo    |                                      | 186,213,33         | Historical ring | 0,72%                              | 0,71%                           | 0,00%   |
| 58 | 1,864,44      | Montecalvario  |                                      | 167,799,60         | Historical ring | 0,65%                              | 0,64%                           | 0,00%   |
| 54 | 1,707,33      | San Lorenzo    | filter strips                        | 153,659,70         | Historical ring | 0,59%                              | 0,59%                           | 0,00%   |
| 53 | 1,643,94      | Avvocata       |                                      | 147,954,33         | Historical ring | 0,57%                              | 0,57%                           | 0,00%   |
| 51 | 1,401,48      | Avvocata       |                                      | 126,133,02         | Historical ring | 0,49%                              | 0,48%                           | 0,00%   |
| 50 | 1,350,54      | Montecalvario  |                                      | 121,548,51         | Historical ring | 0,47%                              | 0,47%                           | 0,00%   |
| 45 | 1,155,04      | Pendino        |                                      | 103,953,69         | Historical ring | 0,40%                              | 0,40%                           | 0,00%   |
| 43 | 1,099,31      | Vomero         |                                      | 98,937,81          | First ring      | 0,38%                              | 0,38%                           | 0,00%   |
| 41 | 924,17        | San Lorenzo    |                                      | 83,175,57          | Historical ring | 0,32%                              | 0,32%                           | 0,00%   |
| 40 | 906,62        | Avvocata       |                                      | 81,595,62          | Historical ring | 0,31%                              | 0,31%                           | 0,00%   |
| 38 | 887,06        | San Lorenzo    |                                      | 79,835,58          | Historical ring | 0,31%                              | 0,31%                           | 0,00%   |
| 35 | 823,89        | Pendino        |                                      | 74,150,19          | Historical ring | 0,29%                              | 0,28%                           | 0,00%   |
| 33 | 780,34        | San Lorenzo    |                                      | 70,230,96          | Historical ring | 0,27%                              | 0,27%                           | 0,00%   |
| 30 | 732,06        | Pendino        |                                      | 65,885,49          | Historical ring | 0,25%                              | 0,25%                           | 0,00%   |
| 28 | 662,57        | Pendino        |                                      | 59,631,03          | Historical ring | 0,23%                              | 0,23%                           | 0,00%   |
| 25 | 638,52        | San Lorenzo    |                                      | 57,466,98          | Historical ring | 0,22%                              | 0,22%                           | 0,00%   |
| 24 | 638,44        | Pendino        |                                      | 57,459,78          | Historical ring | 0,22%                              | 0,22%                           | 0,00%   |
| 21 | 565,29        | Pendino        |                                      | 50,876,37          | Historical ring | 0,20%                              | 0,20%                           | 0,00%   |
| 19 | 494,87        | San Ferdinando |                                      | 44,537,94          | Historical ring | 0,17%                              | 0,17%                           | 0,00%   |
| 18 | 474,03        | San Lorenzo    |                                      | 42,662,52          | Historical ring | 0,16%                              | 0,16%                           | 0,00%   |
| 17 | 468,77        | Pendino        |                                      | 42,189,39          | Historical ring | 0,16%                              | 0,16%                           | 0,00%   |
| 16 | 468,55        | San Lorenzo    |                                      | 42,169,14          | Historical ring | 0,16%                              | 0,16%                           | 0,00%   |
| 9  | 386,61        | Montecalvario  |                                      | 34,794,99          | Historical ring | 0,13%                              | 0,13%                           | 0,00%   |
| 7  | 329,61        | Avvocata       |                                      | 29,664,90          | Historical ring | 0,11%                              | 0,11%                           | 0,00%   |
| 4  | 284,39        | San Lorenzo    |                                      | 25,594,83          | Historical ring | 0,10%                              | 0,10%                           | 0,00%   |
| 3  | 263,79        | Montecalvario  |                                      | 23,741,37          | Historical ring | 0,09%                              | 0,09%                           | 0,00%   |
| 2  | 188,73        | Montecalvario  |                                      | 16,985,25          | Historical ring | 0,07%                              | 0,07%                           | 0,00%   |
| 1  | 109,65        | San Lorenzo    |                                      | 9,868,41           | Historical ring | 0,04%                              | 0,04%                           | 0,00%   |
| 73 | 8,395,37      | Secondigliano  | filter strips and rain garden        | 990,653,42         | Peripheral ring | 2,91%                              | 3,80%                           | -0,89%  |
| 70 | 7,394,53      | Vomero         | bioretention areas and filter strips | 902,132,78         | First ring      | 2,57%                              | 3,46%                           | -0,90%  |

Figure S14. Classification of open spaces, according to adaptation interventions for improving permeability.



| ID | Surface [sqm] | District       | Climate adaption intervention        | Estimated Cost [€] | Context area    | dimensional weight of open space % | economic weight of open space % | Δ       |
|----|---------------|----------------|--------------------------------------|--------------------|-----------------|------------------------------------|---------------------------------|---------|
| 77 | 85,951,13     | Poggioreale    | water square                         | 12.892.669,80      | Peripheral ring | 29,82%                             | 49,50%                          | -19,68% |
| 76 | 35,467,85     | Poggioreale    | rain garden                          | 993.099,74         |                 | 12,31%                             | 3,81%                           | 8,49%   |
| 75 | 26,638,03     | Barra          | water square                         | 3.995.704,50       |                 | 9,24%                              | 15,34%                          | -6,10%  |
| 74 | 24,565,03     | Fuorigrotta    | parking garden                       | 1.621.292,18       |                 | 8,52%                              | 6,22%                           | 2,30%   |
| 73 | 8,395,37      | Secondigliano  | filter strips and rain garden        | 990.653,42         |                 | 2,91%                              | 3,80%                           | -0,89%  |
| 69 | 6,321,09      | Poggioreale    | bioretention areas                   | 202.274,88         |                 | 2,19%                              | 0,78%                           | 1,42%   |
| 68 | 4,945,77      | Fuorigrotta    | rain garden                          | 13.848,142         |                 | 1,72%                              | 0,53%                           | 1,18%   |
| 67 | 3,770,04      | Poggioreale    | bioretention areas                   | 12.064,34          |                 | 1,31%                              | 0,46%                           | 0,84%   |
| 64 | 3,228,01      | Fuorigrotta    | rain garden                          | 90.384,22          |                 | 1,12%                              | 0,55%                           | 0,77%   |
| 60 | 1,944,51      | Fuorigrotta    | bioretention areas                   | 62.224,22          |                 | 0,67%                              | 0,24%                           | 0,44%   |
| 59 | 1,926,56      | Barra          | rain garden                          | 53.943,74          | First ring      | 0,67%                              | 0,21%                           | 0,46%   |
| 26 | 646,03        | Barra          | rain garden                          | 18.088,92          |                 | 0,22%                              | 0,07%                           | 0,15%   |
| 70 | 7,394,53      | Vomero         | bioretention areas and filter strips | 902.132,78         |                 | 2,57%                              | 3,46%                           | -0,90%  |
| 43 | 1,099,31      | Vomero         | filter strips                        | 98.937,81          |                 | 0,38%                              | 0,38%                           | 0,00%   |
| 36 | 874,73        | Vomero         | bioretention areas                   | 41.987,14          |                 | 0,30%                              | 0,16%                           | 0,14%   |
| 31 | 768,70        | Vomero         | bioretention areas                   | 36.897,50          |                 | 0,27%                              | 0,14%                           | 0,13%   |
| 29 | 726,68        | Vomero         | rain garden                          | 20.347,04          |                 | 0,25%                              | 0,08%                           | 0,17%   |
| 8  | 366,33        | Vomero         | bioretention areas                   | 17.583,89          |                 | 0,13%                              | 0,07%                           | 0,06%   |
| 72 | 8,070,28      | San Lorenzo    | bioretention areas                   | 25.824,02          |                 | 2,80%                              | 0,99%                           | 1,81%   |
| 71 | 7,744,56      | Pendino        | rain garden                          | 216.847,57         |                 | 2,69%                              | 0,83%                           | 1,85%   |
| 66 | 3,726,93      | Pendino        | filter strips                        | 335.423,97         | Historical ring | 1,29%                              | 1,29%                           | 0,01%   |
| 65 | 3,463,71      | San Ferdinando | rain garden                          | 96.893,82          |                 | 1,20%                              | 0,37%                           | 0,83%   |
| 63 | 2,713,25      | Pendino        | parking garden                       | 65.117,95          |                 | 0,94%                              | 0,25%                           | 0,69%   |
| 62 | 2,179,46      | Avvocata       | parking garden                       | 52.307,06          |                 | 0,76%                              | 0,20%                           | 0,56%   |
| 61 | 2,069,04      | San Lorenzo    | filter strips                        | 186.213,33         |                 | 0,72%                              | 0,71%                           | 0,00%   |
| 58 | 1,864,44      | Montecalvario  | filter strips                        | 167.799,60         |                 | 0,65%                              | 0,64%                           | 0,00%   |
| 57 | 1,839,17      | San Ferdinando | rain garden                          | 51.496,82          |                 | 0,64%                              | 0,20%                           | 0,44%   |
| 56 | 1,837,22      | San Lorenzo    | rain garden                          | 51.442,19          |                 | 0,64%                              | 0,20%                           | 0,44%   |
| 55 | 1,775,09      | Avvocata       | bioretention areas                   | 56.802,91          |                 | 0,62%                              | 0,23%                           | 0,40%   |
| 54 | 1,707,33      | San Lorenzo    | filter strips                        | 153.659,70         |                 | 0,59%                              | 0,59%                           | 0,00%   |
| 53 | 1,643,94      | Avvocata       | filter strips                        | 147.954,33         | Peripheral ring | 0,57%                              | 0,57%                           | 0,00%   |
| 52 | 1,639,47      | Pendino        | rain garden                          | 45.905,08          |                 | 0,57%                              | 0,18%                           | 0,39%   |
| 51 | 1,401,48      | Avvocata       | filter strips                        | 126.133,02         |                 | 0,49%                              | 0,48%                           | 0,00%   |
| 50 | 1,350,54      | Montecalvario  | filter strips                        | 121.548,51         |                 | 0,47%                              | 0,47%                           | 0,00%   |
| 49 | 1,304,90      | Pendino        | parking garden                       | 54.805,93          |                 | 0,45%                              | 0,21%                           | 0,24%   |
| 48 | 1,273,84      | Avvocata       | rain garden                          | 35.667,60          |                 | 0,44%                              | 0,14%                           | 0,31%   |
| 47 | 1,213,14      | San Lorenzo    | rain garden                          | 33.967,78          |                 | 0,42%                              | 0,13%                           | 0,29%   |
| 46 | 1,173,49      | San Lorenzo    | parking garden                       | 49.286,50          |                 | 0,41%                              | 0,19%                           | 0,22%   |
| 45 | 1,155,04      | Pendino        | filter strips                        | 103.953,69         |                 | 0,40%                              | 0,40%                           | 0,00%   |
| 44 | 1,100,03      | San Lorenzo    | rain garden                          | 30.800,73          |                 | 0,38%                              | 0,12%                           | 0,26%   |
| 42 | 1,012,56      | Montecalvario  | rain garden                          | 28.351,62          | First ring      | 0,35%                              | 0,11%                           | 0,24%   |
| 41 | 924,17        | San Lorenzo    | filter strips                        | 83.175,57          |                 | 0,32%                              | 0,32%                           | 0,00%   |
| 40 | 906,62        | Avvocata       | filter strips                        | 81.595,62          |                 | 0,31%                              | 0,31%                           | 0,00%   |
| 39 | 891,25        | San Lorenzo    | rain garden                          | 24.955,00          |                 | 0,31%                              | 0,10%                           | 0,21%   |
| 38 | 887,06        | San Lorenzo    | filter strips                        | 79.835,58          |                 | 0,31%                              | 0,31%                           | 0,00%   |
| 37 | 885,77        | Pendino        | rain garden                          | 24.801,62          |                 | 0,31%                              | 0,10%                           | 0,21%   |
| 35 | 825,89        | Pendino        | filter strips                        | 74.150,19          |                 | 0,29%                              | 0,28%                           | 0,00%   |
| 34 | 799,41        | Montecalvario  | rain garden                          | 22.383,59          |                 | 0,28%                              | 0,09%                           | 0,19%   |
| 33 | 780,34        | San Lorenzo    | filter strips                        | 70.230,96          |                 | 0,27%                              | 0,27%                           | 0,00%   |
| 32 | 770,35        | Montecalvario  | rain garden                          | 21.569,86          |                 | 0,27%                              | 0,08%                           | 0,18%   |
| 30 | 732,06        | Pendino        | filter strips                        | 65.885,49          | Peripheral ring | 0,25%                              | 0,25%                           | 0,00%   |
| 28 | 662,57        | Pendino        | filter strips                        | 59.631,03          |                 | 0,23%                              | 0,23%                           | 0,00%   |
| 27 | 657,87        | Pendino        | parking garden                       | 27.630,37          |                 | 0,23%                              | 0,11%                           | 0,12%   |
| 25 | 638,52        | San Lorenzo    | filter strips                        | 57.466,98          |                 | 0,22%                              | 0,22%                           | 0,00%   |
| 24 | 638,44        | Pendino        | filter strips                        | 57.459,78          |                 | 0,22%                              | 0,22%                           | 0,00%   |
| 23 | 615,56        | Pendino        | rain garden                          | 17.235,79          |                 | 0,21%                              | 0,07%                           | 0,15%   |
| 22 | 577,55        | Avvocata       | bioretention areas                   | 27.722,35          |                 | 0,20%                              | 0,11%                           | 0,09%   |
| 21 | 565,29        | Pendino        | filter strips                        | 50.876,37          |                 | 0,20%                              | 0,20%                           | 0,00%   |
| 20 | 558,67        | Pendino        | rain garden                          | 15.642,73          |                 | 0,19%                              | 0,06%                           | 0,13%   |
| 19 | 494,87        | San Ferdinando | filter strips                        | 44.537,94          | Historical ring | 0,17%                              | 0,17%                           | 0,00%   |
| 18 | 474,03        | San Lorenzo    | filter strips                        | 42.662,52          |                 | 0,16%                              | 0,16%                           | 0,00%   |
| 17 | 468,77        | Pendino        | filter strips                        | 42.189,39          |                 | 0,16%                              | 0,16%                           | 0,00%   |
| 16 | 468,55        | San Lorenzo    | filter strips                        | 42.169,14          |                 | 0,16%                              | 0,16%                           | 0,00%   |
| 15 | 465,30        | Pendino        | rain garden                          | 13.028,40          |                 | 0,16%                              | 0,05%                           | 0,11%   |
| 14 | 453,73        | Pendino        | rain garden                          | 12.704,47          |                 | 0,16%                              | 0,05%                           | 0,11%   |
| 13 | 445,28        | Avvocata       | bioretention areas                   | 21.373,44          |                 | 0,15%                              | 0,08%                           | 0,07%   |
| 12 | 404,69        | San Lorenzo    | parking garden                       | 16.997,15          |                 | 0,14%                              | 0,07%                           | 0,08%   |
| 11 | 396,45        | Pendino        | rain garden                          | 11.100,66          |                 | 0,14%                              | 0,04%                           | 0,09%   |
| 10 | 392,90        | Montecalvario  | rain garden                          | 11.001,28          |                 | 0,14%                              | 0,04%                           | 0,09%   |
| 9  | 386,61        | Montecalvario  | filter strips                        | 34.794,99          | Peripheral ring | 0,13%                              | 0,13%                           | 0,00%   |
| 7  | 329,61        | Avvocata       | filter strips                        | 29.664,90          |                 | 0,11%                              | 0,11%                           | 0,00%   |
| 6  | 303,21        | Pendino        | rain garden                          | 8.489,91           |                 | 0,11%                              | 0,03%                           | 0,07%   |
| 5  | 302,75        | Avvocata       | rain garden                          | 8.477,08           |                 | 0,11%                              | 0,03%                           | 0,07%   |
| 4  | 284,39        | San Lorenzo    | filter strips                        | 25.594,83          |                 | 0,10%                              | 0,10%                           | 0,00%   |
| 3  | 263,79        | Montecalvario  | filter strips                        | 23.741,37          |                 | 0,09%                              | 0,09%                           | 0,00%   |
| 2  | 188,73        | Montecalvario  | filter strips                        | 16.985,25          |                 | 0,07%                              | 0,07%                           | 0,00%   |
| 1  | 109,65        | San Lorenzo    | filter strips                        | 9.868,41           |                 | 0,04%                              | 0,04%                           | 0,00%   |

Figure S15. Classification of open spaces for improving permeability, according to their district localisation.

| ID | face<br>[m] | District       | Climate adaption intervention    | Estimated<br>Cost [€] | Context area    | cost per<br>inhab. | inhabitants |
|----|-------------|----------------|----------------------------------|-----------------------|-----------------|--------------------|-------------|
| 19 | 31.273,59   | Secondigliano  | greening                         | 1.408.271,42          | Peripheral ring | 3.901,03           | 361         |
| 7  | 8.962,93    | Fuorigrotta    |                                  | 403.907,63            | Peripheral ring | 1.035,66           | 390         |
| 3  | 19.104,92   | Barra          |                                  | 860.361,58            | Peripheral ring | 375,38             | 2292        |
| 6  | 13.416,13   | San Ferdinando |                                  | 603.981,85            | Historical ring | 150,88             | 4003        |
| 4  | 6.017,33    | Vomero         |                                  | 271.163,67            | First ring      | 82,05              | 3305        |
| 8  | 2.534,14    | Vomero         |                                  | 114.420,35            | First ring      | 53,59              | 2135        |
| 20 | 962,04      | Vomero         |                                  | 43.675,89             | First ring      | 36,52              | 1196        |
| 9  | 1.932,27    | Fuorigrotta    |                                  | 87.335,93             | Peripheral ring | 27,21              | 3210        |
| 5  | 653,90      | Vomero         |                                  | 29.809,59             | First ring      | 26,08              | 1143        |
| 17 | 1.733,07    | Secondigliano  |                                  | 78.372,33             | Peripheral ring | 23,81              | 3292        |
| 18 | 1.606,77    | Secondigliano  |                                  | 72.688,52             | Peripheral ring | 21,70              | 3350        |
| 16 | 1.150,11    | Secondigliano  |                                  | 52.139,13             | Peripheral ring | 15,90              | 3280        |
| 15 | 339,53      | San Ferdinando |                                  | 15.342,90             | Historical ring | 7,15               | 2145        |
| 13 | 353,62      | Fuorigrotta    |                                  | 16.296,81             | Peripheral ring | 6,67               | 2442        |
| 2  | 289,28      | Vomero         |                                  | 13.209,78             | First ring      | 4,14               | 3188        |
| 12 | 78,02       | San Ferdinando |                                  | 3.894,81              | Historical ring | 3,55               | 1098        |
| 1  | 248,63      | Barra          |                                  | 11.380,53             | Peripheral ring | 3,20               | 3555        |
| 11 | 59,11       | Montecalvario  |                                  | 3.043,73              | Historical ring | 1,40               | 2172        |
| 14 | 94,05       | Montecalvario  |                                  | 4.296,25              | Historical ring | 1,38               | 3122        |
| 10 | 52,53       | Montecalvario  |                                  | 2.428,03              | Historical ring | 0,77               | 3155        |
| 31 | 39.463,07   | Fuorigrotta    | increasing the presence of trees | 174.085,51            | Peripheral ring | 1.200,59           | 145         |
| 29 | 30.742,18   | Vomero         |                                  | 135.713,57            | First ring      | 110,61             | 1227        |
| 28 | 18.507,79   | Vomero         |                                  | 81.882,28             | First ring      | 56,78              | 1442        |
| 30 | 32.083,21   | Fuorigrotta    |                                  | 141.614,10            | Peripheral ring | 45,22              | 3132        |
| 26 | 13.442,93   | Vomero         |                                  | 59.596,89             | First ring      | 26,87              | 2218        |
| 27 | 17.594,65   | Fuorigrotta    |                                  | 77.864,46             | Peripheral ring | 24,79              | 3141        |
| 23 | 10.771,52   | Fuorigrotta    |                                  | 47.842,70             | Peripheral ring | 22,36              | 2140        |
| 25 | 13.418,23   | Vomero         |                                  | 59.360,20             | First ring      | 18,84              | 3150        |
| 24 | 13.229,43   | Fuorigrotta    |                                  | 58.657,50             | Peripheral ring | 14,62              | 4011        |
| 21 | 2.841,12    | Fuorigrotta    |                                  | 12.820,92             | Peripheral ring | 5,78               | 2220        |
| 22 | 3.779,97    | San Lorenzo    |                                  | 16.951,86             | Historical ring | 5,17               | 3281        |

**Figure S16.** Classification of open spaces, according to adaptation interventions for improving thermal comfort.

| ID | Surface [sqm] | District       | Climate adaption intervention    | Estimated Cost [€] | Context area    | cost per inhab. | inhabitants |
|----|---------------|----------------|----------------------------------|--------------------|-----------------|-----------------|-------------|
| 19 | 31.273,59     | Secondigliano  | greening                         | 1.408.271,42       | Peripheral ring | 3.901,03        | 361         |
| 31 | 39.463,07     | Fuorigrotta    | increasing the presence of trees | 174.085,51         |                 | 1.200,59        | 145         |
| 7  | 8.962,93      | Fuorigrotta    | greening                         | 403.907,63         |                 | 1.035,66        | 390         |
| 3  | 19.104,92     | Barra          | greening                         | 860.361,58         |                 | 375,38          | 2292        |
| 30 | 32.083,21     | Fuorigrotta    | increasing the presence of trees | 141.614,10         |                 | 45,22           | 3132        |
| 9  | 1.932,27      | Fuorigrotta    | greening                         | 87.335,93          |                 | 27,21           | 3210        |
| 27 | 17.594,65     | Fuorigrotta    | increasing the presence of trees | 77.864,46          |                 | 24,79           | 3141        |
| 17 | 1.733,07      | Secondigliano  | greening                         | 78.372,33          |                 | 23,81           | 3292        |
| 23 | 10.771,52     | Fuorigrotta    | increasing the presence of trees | 47.842,70          |                 | 22,36           | 2140        |
| 18 | 1.606,77      | Secondigliano  | greening                         | 72.688,52          |                 | 21,70           | 3350        |
| 16 | 1.150,11      | Secondigliano  | greening                         | 52.139,13          |                 | 15,90           | 3280        |
| 24 | 13.229,43     | Fuorigrotta    | increasing the presence of trees | 58.657,50          |                 | 14,62           | 4011        |
| 13 | 353,62        | Fuorigrotta    | greening                         | 16.296,81          |                 | 6,67            | 2442        |
| 21 | 2.841,12      | Fuorigrotta    | increasing the presence of trees | 12.820,92          |                 | 5,78            | 2220        |
| 1  | 248,63        | Barra          | greening                         | 11.380,53          |                 | 3,20            | 3555        |
| 29 | 30.742,18     | Vomero         | increasing the presence of trees | 135.713,57         | First ring      | 110,61          | 1227        |
| 4  | 6.017,33      | Vomero         | greening                         | 271.163,67         |                 | 82,05           | 3305        |
| 28 | 18.507,79     | Vomero         | increasing the presence of trees | 81.882,28          |                 | 56,78           | 1442        |
| 8  | 2.534,14      | Vomero         | greening                         | 114.420,35         |                 | 53,59           | 2135        |
| 20 | 962,04        | Vomero         | greening                         | 43.675,89          |                 | 36,52           | 1196        |
| 26 | 13.442,93     | Vomero         | increasing the presence of trees | 59.596,89          |                 | 26,87           | 2218        |
| 5  | 653,90        | Vomero         | greening                         | 29.809,59          |                 | 26,08           | 1143        |
| 25 | 13.418,23     | Vomero         | increasing the presence of trees | 59.360,20          |                 | 18,84           | 3150        |
| 2  | 289,28        | Vomero         | greening                         | 13.209,78          |                 | 4,14            | 3188        |
| 6  | 13.416,13     | San Ferdinando | greening                         | 603.981,85         | Historical ring | 150,88          | 4003        |
| 15 | 339,53        | San Ferdinando | greening                         | 15.342,90          |                 | 7,15            | 2145        |
| 22 | 3.779,97      | San Lorenzo    | increasing the presence of trees | 16.951,86          |                 | 5,17            | 3281        |
| 12 | 78,02         | San Ferdinando | greening                         | 3.894,81           |                 | 3,55            | 1098        |
| 11 | 59,11         | Montecalvario  | greening                         | 3.043,73           |                 | 1,40            | 2172        |
| 14 | 94,05         | Montecalvario  | greening                         | 4.296,25           |                 | 1,38            | 3122        |
| 10 | 52,53         | Montecalvario  | greening                         | 2.428,03           |                 | 0,77            | 3155        |

**Figure S17.** Classification of open spaces for improving thermal comfort, according to their district localisation.



| ID | Surface [sqm] | District       | Climate adaption intervention            | Estimated Cost [€] | Context ring    | dimensional weight of open space % | economic weight of open space % | Δ      | cost per inhab. | inhabitants |
|----|---------------|----------------|------------------------------------------|--------------------|-----------------|------------------------------------|---------------------------------|--------|-----------------|-------------|
| 1  | 45010,06      | San Ferdinando | rain gardens                             | 1.890.422,52       | Historical ring | 13,3%                              | 43,0%                           | -29,7% |                 |             |
| 45 | 7289,342      | Ponticelli     |                                          | 306.152,36         | Peripheral ring | 2,2%                               | 7,0%                            | -4,8%  |                 |             |
| 9  | 2021,068      | San Ferdinando |                                          | 140.666,33         | Historical ring | 0,6%                               | 3,2%                            | -2,6%  |                 |             |
| 6  | 1086,697      | Montecalvario  |                                          | 75.634,11          | Historical ring | 0,3%                               | 1,7%                            | -1,4%  |                 |             |
| 11 | 730,935       | Montecalvario  |                                          | 30.699,27          | Historical ring | 0,2%                               | 0,7%                            | -0,5%  |                 |             |
| 10 | 545,405       | San Ferdinando |                                          | 37.960,05          | Historical ring | 0,2%                               | 0,9%                            | -0,7%  |                 |             |
| 3  | 487,013       | San Lorenzo    |                                          | 33.896,10          | Historical ring | 0,1%                               | 0,8%                            | -0,6%  |                 |             |
| 29 | 14983,65      | San Ferdinando |                                          | 183.549,71         | Historical ring | 4,4%                               | 4,2%                            | 0,3%   |                 |             |
| 21 | 13299,431     | Fuorigrotta    |                                          | 162.918,03         | Peripheral ring | 3,9%                               | 3,7%                            | 0,2%   |                 |             |
| 27 | 11538,524     | Fuorigrotta    | permeable surfaces                       | 141.346,92         | Peripheral ring | 3,4%                               | 3,2%                            | 0,2%   |                 |             |
| 47 | 11518,497     | Barra          |                                          | 120.944,22         | Peripheral ring | 3,4%                               | 2,8%                            | 0,7%   |                 |             |
| 28 | 5140,088      | Ponticelli     |                                          | 62.966,08          | Peripheral ring | 1,5%                               | 1,4%                            | 0,1%   |                 |             |
| 41 | 3172,22       | Barra          |                                          | 33.308,31          | Peripheral ring | 0,9%                               | 0,8%                            | 0,2%   |                 |             |
| 20 | 13229,431     | Fuorigrotta    | bioretention area                        | 423.341,79         | Peripheral ring | 3,9%                               | 9,6%                            | -5,7%  |                 |             |
| 30 | 12329,242     | Fuorigrotta    |                                          | 394.535,74         | Peripheral ring | 3,7%                               | 9,0%                            | -5,3%  |                 |             |
| 26 | 10938,554     | Ponticelli     |                                          | 350.093,73         | Peripheral ring | 3,2%                               | 8,0%                            | -4,7%  |                 |             |
| 4  | 2364,849      | San Lorenzo    |                                          | 75.675,17          | Historical ring | 0,7%                               | 1,7%                            | -1,0%  |                 |             |
| 7  | 1182,671      | San Lorenzo    |                                          | 37.845,47          | Historical ring | 0,4%                               | 0,9%                            | -0,5%  |                 |             |
| 15 | 844,992       | San Lorenzo    |                                          | 27.039,74          | Historical ring | 0,3%                               | 0,6%                            | -0,4%  |                 |             |
| 13 | 361,155       | San Lorenzo    |                                          | 11.556,96          | Historical ring | 0,1%                               | 0,3%                            | -0,2%  |                 |             |
| 44 | 28357,89      | San Ferdinando |                                          | 837,46             | Historical ring |                                    |                                 |        | 20,94           | 40          |
| 37 | 28089,598     | Fuorigrotta    | increase presence of trees               | 837,46             | Peripheral ring |                                    |                                 |        | 5,08            | 165         |
| 22 | 26888,617     | Fuorigrotta    |                                          | 124.902,72         | Peripheral ring |                                    |                                 |        | 105,40          | 1185        |
| 35 | 25801,662     | Ponticelli     |                                          | 123.978,23         | Peripheral ring |                                    |                                 |        | 799,86          | 155         |
| 40 | 23053,205     | Ponticelli     |                                          | 118.693,91         | Peripheral ring |                                    |                                 |        | 60,31           | 1968        |
| 55 | 21023,591     | Barra          |                                          | 113.911,31         | Peripheral ring |                                    |                                 |        | 57,56           | 1979        |
| 52 | 20591,567     | Ponticelli     |                                          | 101.818,10         | Peripheral ring |                                    |                                 |        | 39,56           | 2574        |
| 50 | 16777,536     | Ponticelli     |                                          | 92.887,80          | Peripheral ring |                                    |                                 |        | 41,45           | 2241        |
| 24 | 15527,809     | Ponticelli     |                                          | 90.730,89          | Peripheral ring |                                    |                                 |        | 111,46          | 814         |
| 39 | 13526,487     | Fuorigrotta    |                                          | 74.205,16          | Peripheral ring |                                    |                                 |        | 436,50          | 170         |
| 33 | 13466,578     | Secondigliano  | permeable surfaces and bioretention area | 68.706,36          | Peripheral ring |                                    |                                 |        | 61,45           | 1118        |
| 34 | 13466,578     | Secondigliano  |                                          | 59.900,54          | Peripheral ring |                                    |                                 |        | 19,85           | 3017        |
| 48 | 11518,53      | Barra          |                                          | 59.636,94          | Peripheral ring |                                    |                                 |        | 37,89           | 1574        |
| 8  | 10536,703     | San Lorenzo    |                                          | 59.380,94          | Historical ring |                                    |                                 |        | 19,53           | 3041        |
| 46 | 9831,806      | San Ferdinando |                                          | 51.065,53          | Historical ring |                                    |                                 |        | 1.021,31        | 50          |
| 18 | 8827,36       | Barra          |                                          | 46.489,49          | Peripheral ring |                                    |                                 |        | 15,00           | 3100        |
| 38 | 7640,748      | Secondigliano  |                                          | 15.473,50          | Peripheral ring |                                    |                                 |        | 7,72            | 2005        |
| 31 | 7058,815      | Avvocata       |                                          | 39.224,38          | Historical ring |                                    |                                 |        | 41,12           | 954         |
| 51 | 6792,214      | Secondigliano  |                                          | 34.003,29          | Peripheral ring |                                    |                                 |        | 11,33           | 3001        |
| 49 | 5766,92       | Barra          | permeable surfaces and bioretention area | 31.442,79          | Peripheral ring |                                    |                                 |        | 17,03           | 1846        |
| 17 | 5366,675      | Fuorigrotta    |                                          | 30.013,74          | Peripheral ring |                                    |                                 |        | 13,78           | 2178        |
| 16 | 5142,635      | Vomero         |                                          | 25.502,45          | First ring      |                                    |                                 |        | 6,37            | 4001        |
| 53 | 5129,799      | Ponticelli     |                                          | 23.997,37          | Peripheral ring |                                    |                                 |        | 8,95            | 2682        |
| 54 | 5129,799      | Ponticelli     |                                          | 23.011,59          | Peripheral ring |                                    |                                 |        | 9,96            | 2310        |
| 56 | 5090,618      | Barra          |                                          | 22.955,12          | Peripheral ring |                                    |                                 |        | 214,53          | 107         |
| 23 | 4683,992      | Secondigliano  |                                          | 22.955,12          | Peripheral ring |                                    |                                 |        | 22,75           | 1009        |
| 32 | 4427,595      | Barra          |                                          | 22.782,72          | Peripheral ring |                                    |                                 |        | 18,30           | 1245        |
| 25 | 3755,27       | Barra          |                                          | 20.865,56          | Peripheral ring |                                    |                                 |        | 21,16           | 986         |
| 42 | 3172,22       | Ponticelli     | permeable surfaces and bioretention area | 19.865,42          | Peripheral ring |                                    |                                 |        | 20,52           | 968         |
| 14 | 3149,29       | San Ferdinando |                                          | 16.651,19          | Historical ring |                                    |                                 |        | 4,53            | 3677        |
| 58 | 3047,322      | Secondigliano  |                                          | 14.341,77          | Peripheral ring |                                    |                                 |        | 11,29           | 1270        |
| 57 | 2385,66       | Fuorigrotta    |                                          | 14.240,88          | Peripheral ring |                                    |                                 |        | 73,03           | 195         |
| 5  | 2006,34       | San Lorenzo    |                                          | 13.536,22          | Historical ring |                                    |                                 |        | 35,16           | 385         |
| 12 | 1395,408      | San Lorenzo    |                                          | 10.624,90          | Historical ring |                                    |                                 |        | 3,67            | 2898        |
| 19 | 8822,319      | Fuorigrotta    |                                          | 727.841,32         | Peripheral ring | 2,6%                               | 16,6%                           | -13,9% |                 |             |
| 36 | 5753,299      | Ponticelli     |                                          | 312.116,47         | Peripheral ring | 1,7%                               | 7,1%                            | -5,4%  |                 |             |
| 43 | 4840,491      | Barra          |                                          | 166.996,94         | Peripheral ring | 1,4%                               | 3,8%                            | -2,4%  |                 |             |

**Figure S18.** Classification of open spaces according to adaptation interventions for improving permeability and thermal comfort.

| ID | Surface [sqm] | District       | Climate adaption intervention            | Estimated Cost [€] | Context ring    | dimensional weight of open space % | economic weight of open space % | Δ      | cost per inhab. | inhabitants |
|----|---------------|----------------|------------------------------------------|--------------------|-----------------|------------------------------------|---------------------------------|--------|-----------------|-------------|
| 37 | 28089,598     | Fuorigrotta    | increasing presence of trees             | 837,46             | Peripheral ring |                                    |                                 |        | 5,08            | 165         |
| 22 | 26888,617     | Fuorigrotta    | increasing presence of trees             | 124.902,72         |                 |                                    |                                 |        | 105,40          | 1185        |
| 35 | 25801,662     | Ponticelli     | increase presence of trees               | 123.978,23         |                 |                                    |                                 |        | 799,86          | 155         |
| 40 | 23053,205     | Ponticelli     | increasing presence of trees             | 118.693,91         |                 |                                    |                                 |        | 60,31           | 1968        |
| 55 | 21023,591     | Barra          | increasing presence of trees             | 113.911,31         |                 |                                    |                                 |        | 57,56           | 1979        |
| 52 | 20591,567     | Ponticelli     | increasing presence of trees             | 101.818,10         |                 |                                    |                                 |        | 39,56           | 2574        |
| 50 | 16777,536     | Ponticelli     | increasing presence of trees             | 92.887,80          |                 |                                    |                                 |        | 41,45           | 2241        |
| 24 | 15527,809     | Ponticelli     | increasing presence of trees             | 90.730,89          |                 |                                    |                                 |        | 111,46          | 814         |
| 39 | 13526,487     | Fuorigrotta    | increase presence of trees               | 74.205,16          |                 |                                    |                                 |        | 436,50          | 170         |
| 33 | 13466,578     | Secondigliano  | increasing presence of trees             | 68.706,56          |                 |                                    |                                 |        |                 |             |
|    |               |                |                                          |                    |                 |                                    |                                 |        | 61,45           | 1118        |
| 34 | 13466,578     | Secondigliano  | increase presence of trees               | 59.900,54          |                 |                                    |                                 |        | 19,85           | 3017        |
| 21 | 13299,431     | Fuorigrotta    | permeable surfaces                       | 162.918,03         |                 |                                    |                                 |        |                 |             |
|    |               |                |                                          |                    |                 | 3,9%                               | 3,7%                            | 0,2%   |                 |             |
| 20 | 13229,431     | Fuorigrotta    | bioretention area                        | 423.341,79         |                 |                                    |                                 |        |                 |             |
|    |               |                |                                          |                    |                 | 3,9%                               | 9,6%                            | -5,7%  |                 |             |
| 30 | 12329,242     | Fuorigrotta    | bioretention area                        | 394.535,74         |                 |                                    |                                 |        |                 |             |
|    |               |                |                                          |                    |                 | 3,7%                               | 9,0%                            | -5,3%  |                 |             |
| 59 | 11652,30      | Fuorigrotta    | parking gardens                          | 512.701,16         |                 |                                    |                                 |        |                 |             |
|    |               |                |                                          |                    |                 | 3,5%                               | 11,7%                           | -8,2%  |                 |             |
| 27 | 11538,524     | Fuorigrotta    | permeable surfaces                       | 141.346,92         |                 |                                    |                                 |        |                 |             |
|    |               |                |                                          |                    |                 | 3,4%                               | 3,2%                            | 0,2%   |                 |             |
| 48 | 11518,53      | Barra          | increasing presence of trees             | 51.654,12          |                 |                                    |                                 |        | 32,82           | 1574        |
| 47 | 11518,497     | Barra          | permeable surfaces                       | 120.944,22         |                 |                                    |                                 |        |                 |             |
|    |               |                |                                          |                    |                 | 3,4%                               | 2,8%                            | 0,7%   |                 |             |
| 26 | 10958,554     | Ponticelli     | bioretention area                        | 350.053,73         |                 |                                    |                                 |        |                 |             |
|    |               |                |                                          |                    |                 | 3,2%                               | 8,0%                            | -4,7%  |                 |             |
| 18 | 8827,36       | Barra          | increasing presence of trees             | 50.809,39          |                 |                                    |                                 |        | 16,39           | 3100        |
| 19 | 8822,319      | Fuorigrotta    | permeable surfaces and bioretention area | 727.841,32         |                 |                                    |                                 |        |                 |             |
|    |               |                |                                          |                    |                 | 2,6%                               | 16,6%                           | -13,9% |                 |             |
| 38 | 7640,748      | Secondigliano  | increasing presence of trees             | 15.473,50          |                 |                                    |                                 |        | 7,72            | 2005        |
| 45 | 7289,342      | Ponticelli     | rain gardens                             | 306.152,36         |                 |                                    |                                 |        |                 |             |
|    |               |                |                                          |                    |                 | 2,2%                               | 7,0%                            | -4,8%  |                 |             |
| 51 | 6792,214      | Secondigliano  | increase presence of trees               | 34.003,29          |                 |                                    |                                 |        | 11,33           | 3001        |
| 49 | 5766,92       | Barra          | increase presence of trees               | 32.457,10          |                 |                                    |                                 |        | 17,58           | 1846        |
| 36 | 5753,299      | Ponticelli     | permeable surfaces and bioretention area | 312.116,47         |                 |                                    |                                 |        |                 |             |
|    |               |                |                                          |                    |                 | 1,7%                               | 7,1%                            | -5,4%  |                 |             |
| 17 | 5366,675      | Fuorigrotta    | increasing presence of trees             | 25.502,45          |                 |                                    |                                 |        | 11,71           | 2178        |
| 28 | 5140,088      | Ponticelli     | permeable surfaces                       | 62.966,08          |                 |                                    |                                 |        |                 |             |
|    |               |                |                                          |                    |                 | 1,5%                               | 1,4%                            | 0,1%   |                 |             |
| 53 | 5129,799      | Ponticelli     | increase presence of trees               | 23.997,37          |                 |                                    |                                 |        | 8,95            | 2682        |
| 54 | 5129,799      | Ponticelli     | increasing presence of trees             | 23.000,39          |                 |                                    |                                 |        | 9,96            | 2310        |
| 56 | 5090,618      | Barra          | increasing presence of trees             | 22.955,12          |                 |                                    |                                 |        | 214,53          | 107         |
| 43 | 4840,491      | Barra          | permeable surfaces and bioretention area | 166.996,94         |                 |                                    |                                 |        |                 |             |
|    |               |                |                                          |                    |                 | 1,4%                               | 3,8%                            | -2,4%  |                 |             |
| 23 | 4683,992      | Secondigliano  | increase presence of trees               | 22.782,72          |                 |                                    |                                 |        | 22,58           | 1009        |
| 32 | 4427,595      | Barra          | increasing presence of trees             | 21.682,16          |                 |                                    |                                 |        | 17,42           | 1245        |
| 25 | 3755,27       | Barra          | increase presence of trees               | 20.865,56          |                 |                                    |                                 |        | 21,16           | 986         |
| 41 | 3172,22       | Barra          | permeable surfaces                       | 33.308,31          |                 |                                    |                                 |        |                 |             |
|    |               |                |                                          |                    |                 | 0,9%                               | 0,8%                            | 0,2%   |                 |             |
| 42 | 3172,22       | Ponticelli     | increasing presence of trees             | 16.907,19          |                 |                                    |                                 |        | 17,47           | 968         |
| 58 | 3047,322      | Secondigliano  | increase presence of trees               | 14.341,77          |                 |                                    |                                 |        | 11,29           | 1270        |
| 57 | 2385,66       | Fuorigrotta    | increasing presence of trees             | 14.341,77          |                 |                                    |                                 |        |                 |             |
|    |               |                |                                          |                    |                 |                                    |                                 |        | 73,55           | 195         |
| 16 | 5142,635      | Vomero         | increasing presence of trees             | 13.536,22          | First ring      |                                    |                                 |        | 3,38            | 4001        |
| 1  | 45010,06      | San Ferdinando | rain gardens                             | 1.890.422,52       | Historical ring |                                    |                                 |        |                 |             |
|    |               |                |                                          |                    |                 | 13,5%                              | 43,0%                           | -29,7% |                 |             |
| 44 | 28557,89      | San Ferdinando | increase presence of trees               | 837,46             |                 |                                    |                                 |        | 20,94           | 40          |
| 29 | 14983,65      | San Ferdinando | permeable surfaces                       | 183.549,71         |                 |                                    |                                 |        |                 |             |
|    |               |                |                                          |                    |                 | 4,4%                               | 4,2%                            | 0,3%   |                 |             |
| 8  | 10536,705     | San Lorenzo    | increasing presence of trees             | 124.902,72         |                 |                                    |                                 |        | 41,07           | 3041        |
| 46 | 9851,806      | San Ferdinando | increase presence of trees               | 66.312,06          |                 |                                    |                                 |        | 1.326,24        | 50          |
| 31 | 7058,815      | Avvocata       | increasing presence of trees             | 46.745,49          |                 |                                    |                                 |        | 49,00           | 954         |
| 14 | 3149,29       | San Ferdinando | increasing presence of trees             | 43.387,95          |                 |                                    |                                 |        | 11,80           | 3677        |
| 4  | 2364,849      | San Lorenzo    | bioretention area                        | 75.675,17          |                 |                                    |                                 |        |                 |             |
|    |               |                |                                          |                    |                 | 0,7%                               | 1,7%                            | -1,0%  |                 |             |
| 9  | 2021,068      | San Ferdinando | rain gardens                             | 140.666,33         |                 |                                    |                                 |        |                 |             |
|    |               |                |                                          |                    |                 | 0,6%                               | 3,2%                            | -2,6%  |                 |             |
| 5  | 2006,34       | San Lorenzo    | increasing presence of trees             | 10.533,34          |                 |                                    |                                 |        | 27,36           | 385         |
| 12 | 1395,408      | San Lorenzo    | increasing presence of trees             | 9.020,70           |                 |                                    |                                 |        | 3,11            | 2898        |
| 7  | 1182,671      | San Lorenzo    | bioretention area                        | 37.845,47          |                 |                                    |                                 |        |                 |             |
|    |               |                |                                          |                    |                 | 0,4%                               | 0,9%                            | -0,5%  |                 |             |
| 6  | 1086,697      | Montecalvario  | rain gardens                             | 75.634,11          |                 |                                    |                                 |        |                 |             |
|    |               |                |                                          |                    |                 | 0,3%                               | 1,7%                            | -1,4%  |                 |             |
| 15 | 844,992       | San Lorenzo    | bioretention area                        | 27.099,74          |                 |                                    |                                 |        |                 |             |
|    |               |                |                                          |                    |                 | 0,3%                               | 0,6%                            | -0,4%  |                 |             |
| 11 | 730,955       | Montecalvario  | rain gardens                             | 30.699,27          |                 |                                    |                                 |        |                 |             |
|    |               |                |                                          |                    |                 | 0,2%                               | 0,7%                            | -0,5%  |                 |             |
| 10 | 545,403       | San Ferdinando | rain gardens                             | 37.960,05          |                 |                                    |                                 |        |                 |             |
|    |               |                |                                          |                    |                 | 0,2%                               | 0,9%                            | -0,7%  |                 |             |
| 2  | 537,949       | San Lorenzo    | parking gardens                          | 23.669,76          |                 |                                    |                                 |        |                 |             |
|    |               |                |                                          |                    |                 | 0,2%                               | 0,5%                            | -0,4%  |                 |             |
| 3  | 487,015       | San Lorenzo    | rain gardens                             | 33.896,10          |                 |                                    |                                 |        |                 |             |
|    |               |                |                                          |                    |                 | 0,1%                               | 0,8%                            | -0,6%  |                 |             |
| 13 | 361,155       | San Lorenzo    | bioretention area                        | 11.556,96          |                 |                                    |                                 |        |                 |             |
|    |               |                |                                          |                    |                 | 0,1%                               | 0,3%                            | -0,2%  |                 |             |

**Figure S19.** Classification of open spaces for improving permeability and thermal comfort, according to their district localisation.

## **Description of the proposed climate adaptation interventions**

(references n. 11, 50, 51)

### **Rain garden**

Small gardens that are used for infiltration and storage. Also frequently known as "bioretention areas". They are typically used at the level of a single property, for instance, close to buildings, to collect rainwater infiltration from the roofs. They are made up of a variety of elements, including sand beds, flora, minor stagnation basins, manmade wetlands and filtering meadow strips. Either the water is gathered and pumped back into the collector system, or it seeps into the ground.

### **Bioretention area**

Ponds built with extra storage space to prevent washout during heavy downpours and gradually discharge the runoff. They are made up of an area with natural banks and a permanent pond. They are created by creating a new depression, exploiting an existing one or employing levees. It would be wiser to avoid using natural water sources to reduce the possibility that pollution and poor water quality will upset or harm the environment. In the event that they become overfilled, they are provided with an outlet to the collector system.

### **Permeable surface**

Permeable surfaces provide a surface suitable for pedestrian and/or vehicular traffic while allowing rainwater to infiltrate through the surface and into underlying layers. The water can be temporarily stored before infiltration to the ground, reused, or discharged to a watercourse or other drainage system. Surfaces with an aggregate sub-base can provide good water quality treatment.

### **Filter strip**

Filter strips are gently sloped areas designed to receive sheet flows from adjacent impervious surfaces. Filter strips are vegetated with grasses and groundcovers that filter and reduce the velocity of stormwater. Peak stormwater flows are attenuated as stormwater travels across the filter strip and infiltrates or is stored temporarily in the soils below. They treat runoff by vegetative filtering and promote the settlement of particulate pollutants and infiltration.

### **Water square**

Water squares feature lower-lying areas that can be submerged in the case of heavy rainfall. The runoff from the surrounding district is connected to the square by open drains or rainwater drainage systems. After rainfall, the lowest parts of the water square fill up first, and the water remains there longest. The parts that become submerged need to be easy to clean and must be cleaned after every rainfall.

### **Parking garden**

Parking gardens make it possible to think of car parks not only in functional terms as parking places for cars but as real usable green spaces. In fact, if, on the one hand, the same surface area results in fewer parking spaces, on the other hand, areas previously thought only for parking cars become parks, with filtering trenches and vegetated canals that channel rainwater into ponds. The ponds themselves, as well as allowing greater biodiversity, can be used to collect rainwater for both external uses, e.g. to irrigate the greenery, and internal use, e.g. for fire-fighting. Parking gardens contribute, thanks to the vegetation present, to reducing summer heat islands by increasing the usability of the area. Finally, if designed



appropriately, they make it possible to make the most of the phyto-depuration processes that occur in bioretention areas, minimising the risk of pollutant discharge into water bodies.

#### Greening

The presence of vegetation and, moreover, of trees contributes to climate change adaptation, compared to impervious surfaces, thanks to evapotranspiration and drainage processes.
